# Supplementary material for: Salinity Gradient Controls Microbial Community Structure and Assembly in Coastal Solar Salterns
Source: MDPI journal article supplement (doi:10.3390/genes13020385), 2022-02-21
Supplement: s1 [file s1]

## Supplementary figures

Salinity gradient controls microbial community structure and assembly in coastal solar salterns

Tianran Song<sup>1</sup>, Qiyun Liang<sup>2</sup>, Zhaozhong Du<sup>2</sup>, Xiaoqun Wang<sup>2</sup>, Guan-Jun Chen<sup>2</sup>, Zong-Jun Du<sup>2\*</sup>, Da-Shuai Mu<sup>1,2\*</sup>

<sup>1</sup> SDU-ANU Joint Science College, Shandong University, Weihai 264209, PR China

<sup>2</sup> College of Marine Science, Shandong University, Weihai 264209, PR China

**Running title:** Microbial community assembly in the solar saltern

\*Address correspondence to:

Zong-Jun Du, E-mail: duzongjun@sdu.edu.cn; Tel. (+86) 06315688303. Mailing address: College of Marine Science, Shandong University (Weihai), 180 Wenhua Road, Weihai, Box 264209, PR China

Da-Shuai Mu, E-mail: dashuai.mu@sdu.edu.cn; Tel. (+86) 06315688303. Mailing address: College of Marine Science, Shandong University (Weihai), 180 Wenhua Road, Weihai, Box 264209, PR China

## Conflict of Interest

No conflict of interest exists in the submission of this manuscript, and the manuscript has been approved by all authors for publication.

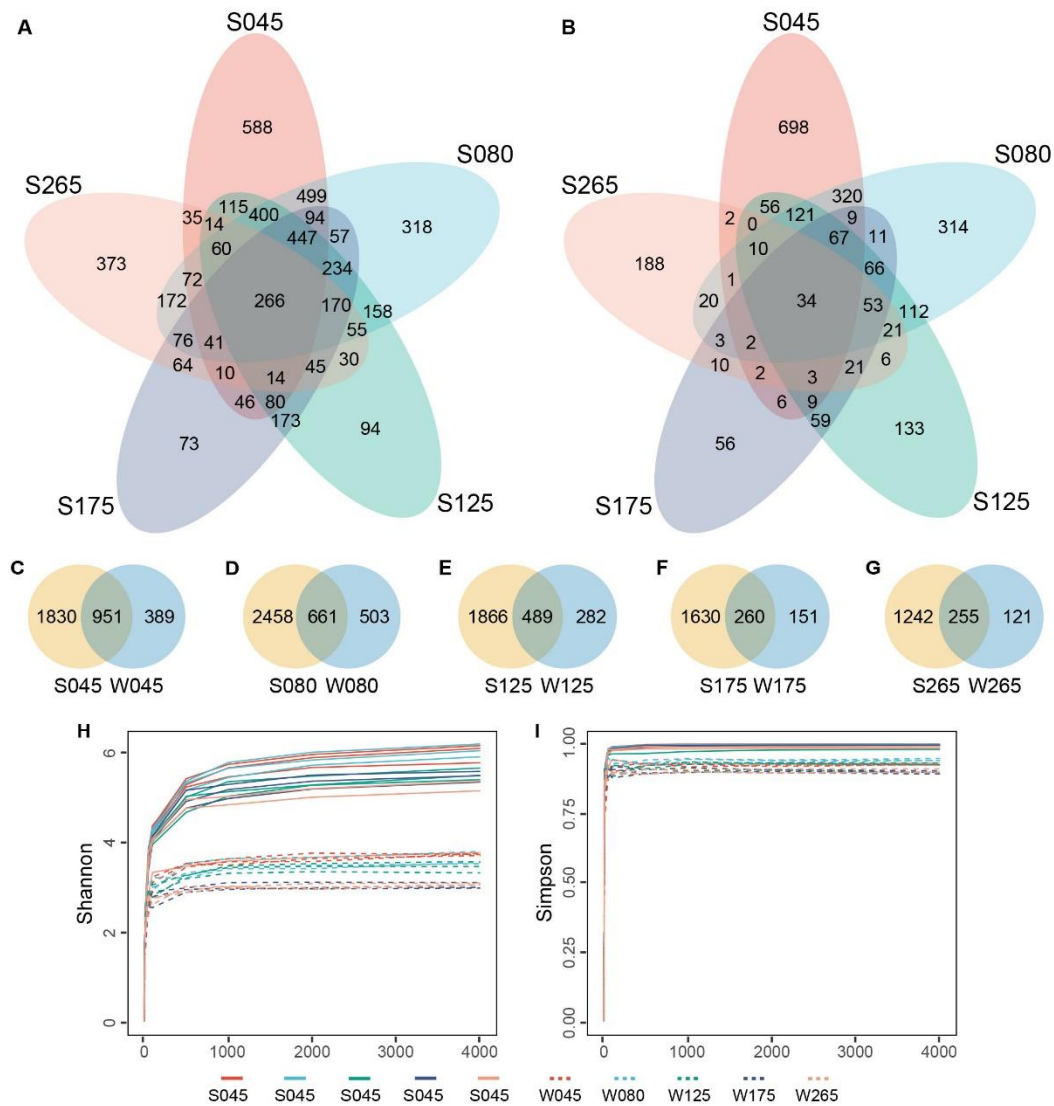

**Figure S1. Venn diagrams showing the shared and unique OTUs.**

**A-B**, Visualization of venn diagrams in sediment and water groups. **C-G**, Visualization of venn diagrams at same sampling site, comparing the shared and unique OTUs between sediment and water samples. **H-I**, Visualization of rarefaction curve on basis of Shannon and simpson index.

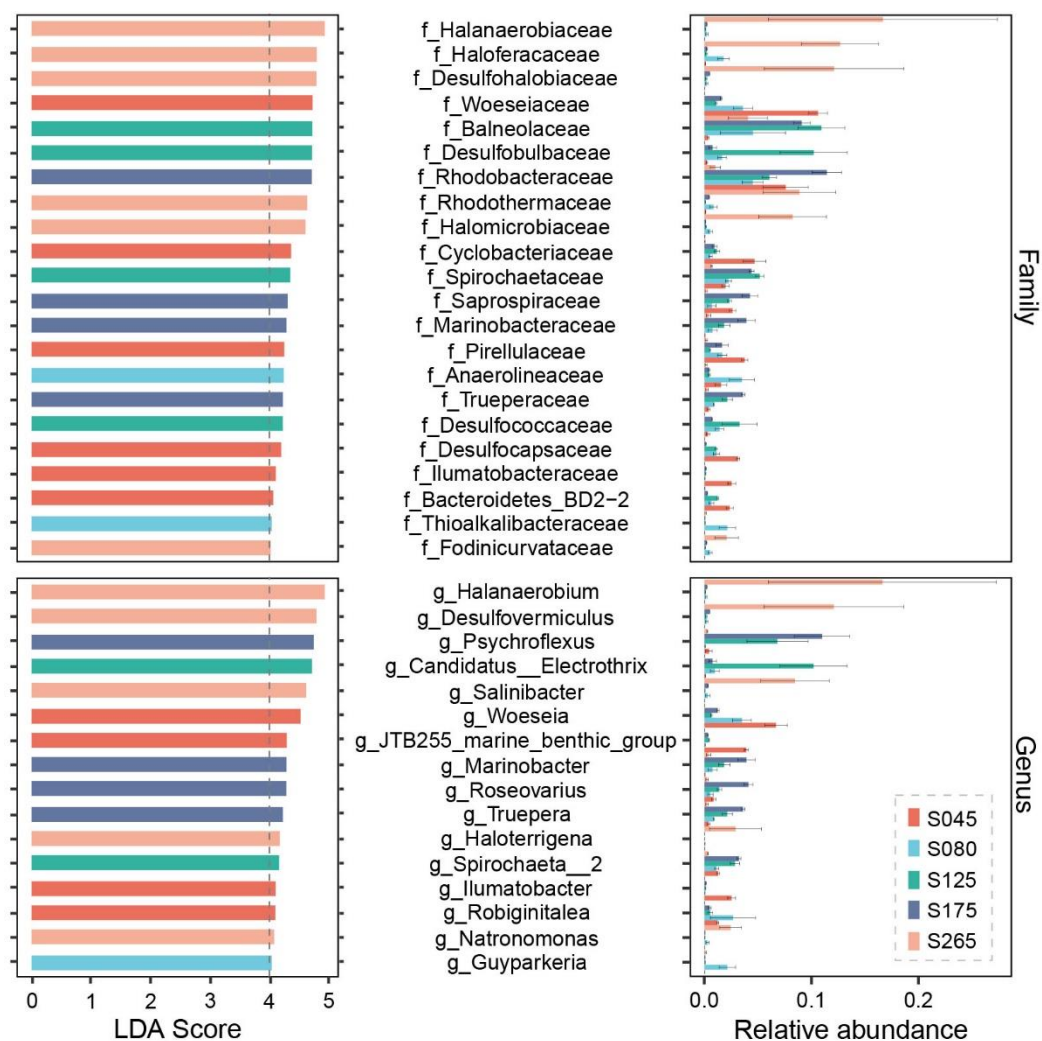

**Figure S2. Differential abundance test in sediment of salterns.**

The significant family and genus taxa, determining the community differences across groups, were confirmed by R package {microeco} on basis of LEFSe method.

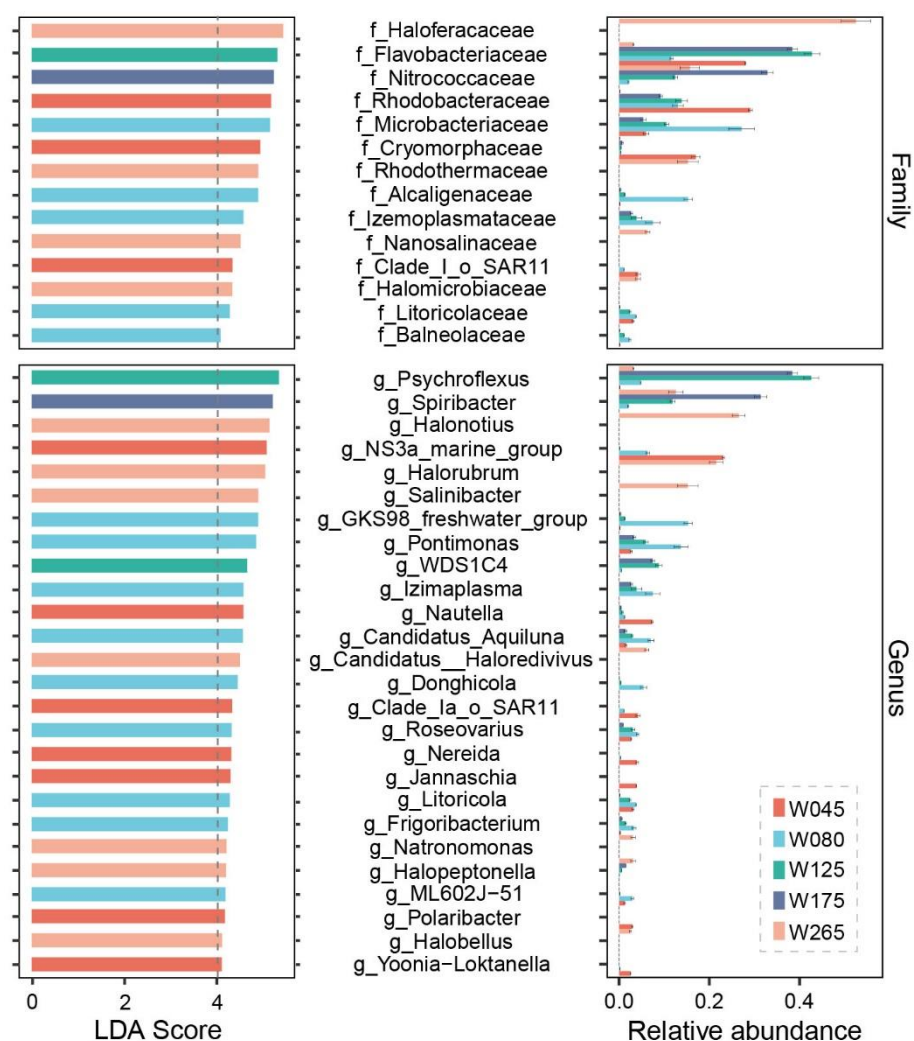

**Figure S3. Differential abundance test in water of salterns.**

The significant family and genus taxa, determining the community differences across groups, were confirmed by R package {microeco} on basis of LEFSe method.

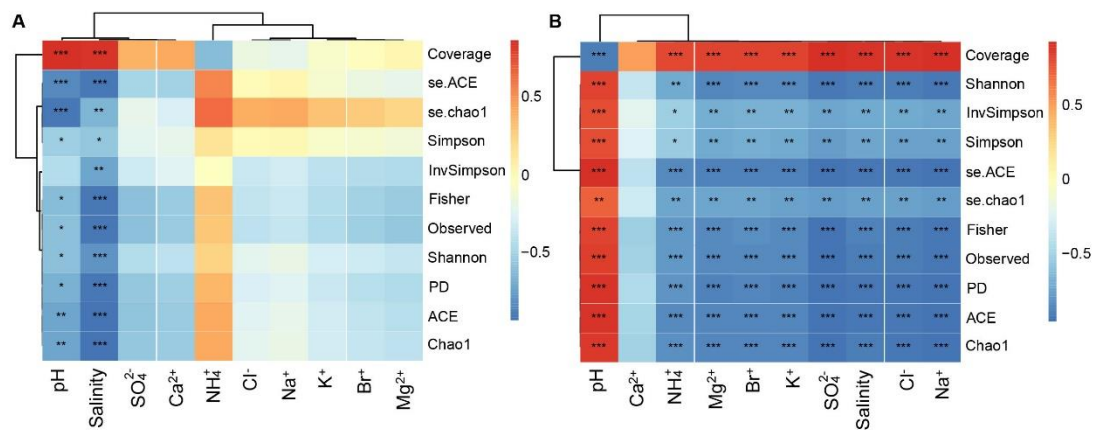

**Figure S4. The relationships between physicochemical factors and alpha diversities of prokaryotic community.**

**A-B,** The strong-related genus taxa with physicochemical factors were shown (A, sediment groups; B, water groups). Significant differences were marked. (\*  $0.01 < P \leq 0.05$ , \*\*  $0.001 < P \leq 0.01$ , \*\*\*  $P \leq 0.001$ )
