# Supplementary material for: Salinity Gradient Controls Microbial Community Structure and Assembly in Coastal Solar Salterns
Source: Genes (Basel). 2022 Feb 21;13(2):385. doi: 10.3390/genes13020385 (PMC8872224; doi:10.3390/genes13020385)
Supplement: Supplementary file 1 [file genes-13-00385-s001.zip › supplementary tables 1-5.xlsx]

## Sheet: Table_S1
Table S1 The relative abundance of abundant phylum taxa both in sediment and water samples
Taxonomy	S045	S080	S125	S175	S265	W045	W080	W125	W175	W265
k_Archaea|p_Halobacterota	20.42	22.11	25.81	18.92	11.53	1.08	3.33	12.95	29.42	11.29
k_Archaea|p_Nanoarchaeota	1.67	2.7	0.85	0.66	3.77	0.03	0.38	0.34	0.12	0.33
k_Archaea|p_Nanohaloarchaeota	3.46	3.77	1.44	0.74	1.35	0.18	0.43	6.89	1.01	0.27
k_Bacteria|p_Bacteroidota	10.98	14.55	12.74	14.43	13.61	29.08	23.24	30.71	23.1	23.58
k_Bacteria|p_Bdellovibrionota	1.42	0.59	0.76	0.75	0.54	7.97	1.4	1.15	1.09	0.49
k_Bacteria|p_Chloroflexi	3.5	3.14	2.14	1.5	1.05	2.31	0.53	0.78	0.33	0.68
k_Bacteria|p_Desulfobacterota	6.85	3.3	2.09	2.17	2.37	1.58	1.22	2.12	5.81	1.47
k_Bacteria|p_Firmicutes	5.11	5.04	3.76	4.87	3.04	4.56	14.13	7.03	4.95	1.18
k_Bacteria|p_Halanaerobiaeota	1.45	1.26	1.39	2.73	0.7	0.65	14.83	1.35	0.34	0.09
k_Bacteria|p_Myxococcota	1.55	1.51	1.3	0.66	0.36	2.11	0.72	0.49	0.09	0.14
k_Bacteria|p_Planctomycetota	6.72	10.33	6.62	8.06	6.07	19.76	5.82	9.08	15.37	9.61
k_Bacteria|p_Proteobacteria	19.13	18.87	28.16	28.09	30.1	15.58	20.73	19.11	14.02	18.6
k_Bacteria|p_Spirochaetota	2.08	1.28	3.64	3.64	4.42	6.42	1.5	2.11	0.77	0.14
k_Bacteria|p_Verrucomicrobiota	3.22	2.74	3.26	5.41	2.48	1.18	9.2	3.72	1.79	24.21

## Sheet: Table_S2
Table S2 The characteritions of physicochemical factors between sediment and water samples
SampleIDs	CI- (mg/g)	Br+ (mg/g)	SO42- (mg/g)	Na+ (mg/g)	NH4+ (mg/g)	K+ (mg/g)	Mg2+ (mg/g)	Ca2+ (mg/g)	pH	Salinity (g/L)
S045_1	45.47	0.17	5.77	26.56	0.08	1.38	3.14	0.83	7.7	45
S045_2	43.52	0.16	5.58	25.61	0.08	1.35	2.89	0.84	7.91	45
S045_3	46.68	0.18	6.11	27.18	0.08	1.36	3.33	0.94	7.68	45
S080_1	28.8	0.11	5.97	17.44	0.07	0.9	2.03	1.1	7.8	80
S080_2	38.21	0.15	25.94	23.52	0.02	1.39	3	7.67	7.86	80
S080_3	21.62	0.09	18.07	13.72	0.03	0.98	1.77	5.51	7.82	80
S125_1	74.79	0.3	11.67	42.17	0.05	2.03	5.74	1.66	7.77	125
S125_2	111.35	0.44	19.45	61.38	0.17	3.48	8.8	3.59	7.74	125
S125_3	96.25	0.38	18.07	53.89	0.09	2.94	7.66	2.86	7.79	125
S175_1	122.05	0.49	36.28	66.6	0.06	3.33	10.01	10.3	7.46	175
S175_2	94.15	0.38	29.71	51.89	0.04	2.6	7.74	8.5	7.79	175
S175_3	121.33	0.51	33.34	68.95	0.06	3.49	10.27	8.79	7.88	175
S265_1	49.79	0.25	26	27.06	0.01	1.77	5.29	7.24	8.53	265
S265_2	56.42	0.28	26.5	30.32	0.01	2.02	5.84	7.28	8.6	265
S265_3	45.39	0.23	23.3	25.04	0.02	1.68	4.63	6.36	8.59	265
W045_1	24.19	0.08	3.45	13.54	0	0.49	1.73	0.53	8.01	45
W045_2	23.19	0.08	3.26	13.02	0.01	0.47	1.65	0.5	8.05	45
W045_3	20.39	0.07	2.98	11.9	0.02	0.42	1.51	0.44	8	45
W080_1	37.52	0.14	5.68	21.11	0.01	0.78	2.82	0.85	8.14	80
W080_2	37.41	0.14	5.62	21.61	0.03	0.79	2.87	0.86	8.11	80
W080_3	37.48	0.14	5.59	21.23	0.02	0.78	2.84	0.84	8.05	80
W125_1	58.55	0.23	9	33.57	0.04	1.36	4.85	1.24	7.84	125
W125_2	58.48	0.23	8.89	33.52	0.05	1.31	4.83	1.23	7.78	125
W125_3	60.46	0.24	9.04	33.58	0.02	1.33	4.84	1.24	7.83	125
W175_1	81.28	0.33	12.02	45.97	0.03	1.88	6.96	1.14	7.75	175
W175_2	81.59	0.33	11.79	46	0.03	1.88	6.95	1.15	7.74	175
W175_3	80.44	0.33	11.55	45.43	0.04	1.84	6.86	1.21	7.73	175
W265_1	119.25	0.6	15.2	62.96	0.05	3.35	12.33	0.62	7.52	265
W265_2	118.25	0.6	15.82	62.73	0.06	3.25	12.15	0.74	7.54	265
W265_3	118.64	0.6	16.01	63.21	0.05	3.36	12.34	0.65	7.53	265

## Sheet: Table_S3
Table S3 The Mantel test between Bray distance and physicochemical factors
Groups	Factors	Pearson' r2	P_values	Significance
Sediment	CI-	0.136	0.109
	Br+	0.176	0.079
	SO42-	0.245	0.036	*
	Na+	0.126	0.143
	NH4+	0.184	0.12
	K+	0.131	0.114
	Mg2+	0.191	0.061
	Ca2+	0.23	0.021	*
	Salinity	0.877	0.001	***
	pH	0.703	0.002	**
Water	CI-	0.887	0.001	***
	Br+	0.837	0.001	***
	SO42-	0.903	0.001	***
	Na+	0.897	0.001	***
	NH4+	0.596	0.001	***
	K+	0.838	0.001	***
	Mg2+	0.84	0.001	***
	Ca2+	0.529	0.002	**
	Salinity	0.886	0.001	***
	pH	0.77	0.001	***

## Sheet: Table_S4
Table S4 The characteritions of networks between sediment and water groups
	Network Index	Sediment	Water
Experiential Network	Total nodes	495	151
	Total links	1377	755
	R square of power-law	0.862	0.665
	Average degree (avgK)	5.564	10
	Average clustering coefficient (avgCC)	0.124	0.39
	Average path distance (APD)	4.45	3.075
	Graph Density (GD)	0.011	0.067
	Transitivity (Trans)	0.118	0.349
	Positive links	0.68	0.76
	Negative links	0.32	0.24
Random Network	Average path distance (APD)	3.799 ± 0.013	2.423 ± 0.005
	Average clustering coefficient (avgCC)	0.011 ± 0.003	0.067 ± 0.006
	Modularity	0.406 ± 0.005	0.264 ± 0.007

## Sheet: Table_S5
Table S5 The summaration of putative roles in networks
OTUID	Group	Zi	Pi	Module	Role	Kingdom	Phylum	Class	Order	Family
OTU_1016	Sediment	-0.604106	0.653061	4	Connectors	k_Bacteria	p_Proteobacteria	c_Gammaproteobacteria	o_Steroidobacterales	f_Woeseiaceae
OTU_1029	Sediment	-0.855329	0	3	Peripherals	k_Bacteria	p_Bacteroidota	c_Bacteroidia	o_Flavobacteriales	f_Flavobacteriaceae
OTU_103	Sediment	-0.855329	0	3	Peripherals	k_Archaea	p_Halobacterota	c_Halobacteria	o_Halobacterales	f_Halomicrobiaceae
OTU_104	Sediment	-1.00125	0.5	2	Peripherals	k_Archaea	p_Halobacterota	c_Halobacteria	o_Halobacterales	f_Haloferacaceae
OTU_105	Sediment	-0.522002	0.48	3	Peripherals	k_Archaea	p_Halobacterota	c_Halobacteria	o_Halobacterales	f_Haloferacaceae
OTU_1057	Sediment	0.343693	0.375	1	Peripherals	k_Bacteria	p_Bacteroidota	c_Bacteroidia	o_Flavobacteriales	f_Flavobacteriaceae
OTU_107	Sediment	1.31129	0.432133	3	Peripherals	k_Archaea	p_Halobacterota	c_Halobacteria	o_Halobacterales	f_Halomicrobiaceae
OTU_1085	Sediment	1.55194	0.32	2	Peripherals	k_Bacteria	p_Desulfobacterota	c_Desulfobulbia	o_Desulfobulbales	f_Desulfobulbaceae
OTU_1086	Sediment	2.85774	0.244898	8	Module hubs	k_Bacteria	p_Proteobacteria	c_Gammaproteobacteria	o_Nitrococcales	f_Nitrococcaceae
OTU_1089	Sediment	-0.855329	0	3	Peripherals	k_Bacteria	p_Desulfobacterota	c_Desulfobacteria	o_Desulfobacterales	f_Desulfococcaceae
OTU_109	Sediment	-0.688666	0	3	Peripherals	k_Archaea	p_Halobacterota	c_Halobacteria	o_Halobacterales	f_Halomicrobiaceae
OTU_1090	Sediment	0.200842	0.244898	5	Peripherals	k_Bacteria	p_Bacteroidota	c_Bacteroidia	o_Chitinophagales	f_Saprospiraceae
OTU_1095	Sediment	3.25407	0.40625	2	Module hubs	k_Bacteria	p_Desulfobacterota	c_Desulfobacteria	o_Desulfobacterales	f_Desulfobacteraceae
OTU_1096	Sediment	2.44314	0.617284	7	Peripherals	k_Bacteria	p_Proteobacteria	c_Gammaproteobacteria	o_Ectothiorhodospirales	f_Ectothiorhodospiraceae
OTU_1099	Sediment	3.10985	0.1504	4	Module hubs	k_Bacteria	p_Verrucomicrobiota	c_Verrucomicrobiae	o_Opitutales	f_Puniceicoccaceae
OTU_1102	Sediment	1.27678	0.336735	5	Peripherals	k_Bacteria	p_Proteobacteria	c_Gammaproteobacteria	o_Gammaproteobacteria__Incertae__Sedis	f_Unknown__Family
OTU_1103	Sediment	-0.355339	0	3	Peripherals	k_Bacteria	p_Desulfobacterota	c_Desulfobacteria	o_Desulfobacterales	f_Desulfobacteraceae
OTU_1109	Sediment	0.554118	0.53125	6	Peripherals	k_Bacteria	p_Desulfobacterota	c_Desulfuromonadia	o_Geopsychrobacteraceae	f_Desulfuromusa
OTU_1110	Sediment	0.41603	0	5	Peripherals	k_Bacteria	p_Acidobacteriota	c_Thermoanaerobaculia	o_Thermoanaerobaculales	f_Thermoanaerobaculaceae
OTU_1113	Sediment	-0.789804	0	4	Peripherals	k_Bacteria	p_Planctomycetota	c_Phycisphaerae	o_Phycisphaerales	f_Phycisphaeraceae
OTU_1114	Sediment	-0.157622	0.625	7	Connectors	k_Bacteria	p_Proteobacteria	c_Gammaproteobacteria	o_SZB7	f_uncultured__bacterium
OTU_1118	Sediment	-0.150188	0	2	Peripherals	k_Bacteria	p_Desulfobacterota	c_Desulfobulbia	o_Desulfobulbales	f_Desulfocapsaceae
OTU_1119	Sediment	0.311315	0	3	Peripherals	k_Bacteria	p_Chloroflexi	c_Anaerolineae	o_Anaerolineales	f_Anaerolineaceae
OTU_1121	Sediment	0	0	16	Peripherals	k_Bacteria	p_Chloroflexi	c_Anaerolineae	o_Anaerolineales	f_Anaerolineaceae
OTU_1122	Sediment	0	0	14	Peripherals	k_Bacteria	p_Desulfobacterota	c_Desulfobacteria	o_Desulfobacterales	f_Desulfococcaceae
OTU_1123	Sediment	-0.444722	0.375	5	Peripherals	k_Bacteria	p_Desulfobacterota	c_Desulfuromonadia	o_Geothermobacteraceae	f_Geothermobacter
OTU_1124	Sediment	-0.591153	0.72	1	Connectors	k_Bacteria	p_Proteobacteria	c_Gammaproteobacteria	o_Chromatiales	f_Chromatiaceae
OTU_1128	Sediment	-0.75	0	10	Peripherals	k_Bacteria	p_Marinimicrobia__(SAR406__clade)	c_uncultured__organism	o_uncultured__organism	f_uncultured__bacterium
OTU_1129	Sediment	0.258199	0	9	Peripherals	k_Bacteria	p_Desulfobacterota	c_Desulfuromonadia	o_Bradymonadales	f_Bradymonadaceae
OTU_1130	Sediment	-1.00125	0.5	2	Peripherals	k_Bacteria	p_Desulfobacterota	c_Desulfobacteria	o_Desulfobacterales	f_Desulfosarcinaceae
OTU_1133	Sediment	-0.444722	0.375	5	Peripherals	k_Bacteria	p_Bacteroidota	c_Bacteroidia	o_Flavobacteriales	f_Flavobacteriaceae
OTU_1134	Sediment	-0.12373	0.32	1	Peripherals	k_Bacteria	p_Acidobacteriota	c_Subgroup__22	o_uncultured__organism	f_uncultured__bacterium
OTU_1135	Sediment	-0.0220121	0	3	Peripherals	k_Bacteria	p_Desulfobacterota	c_Desulfobacteria	o_Desulfobacterales	f_Desulfosarcinaceae
OTU_1141	Sediment	-1.00125	0	2	Peripherals	k_Bacteria	p_Bacteroidota	c_Rhodothermia	o_Rhodothermales	f_Rhodothermaceae
OTU_1142	Sediment	-0.522002	0	3	Peripherals	k_Bacteria	p_Proteobacteria	c_Gammaproteobacteria	o_Oceanospirillales	f_Nitrincolaceae
OTU_1144	Sediment	-0.824864	0.5	1	Peripherals	k_Bacteria	p_Desulfobacterota	c_Desulfobacteria	o_Desulfobacterales	f_Desulfococcaceae
OTU_1148	Sediment	-0.0470121	0.375	4	Peripherals	k_Bacteria	p_Spirochaetota	c_Leptospirae	o_Leptospirales	f_Leptospiraceae
OTU_1149	Sediment	-0.591153	0	1	Peripherals	k_Bacteria	p_Proteobacteria	c_Gammaproteobacteria	o_Nitrosococcales	f_Methylophagaceae
OTU_115	Sediment	-0.824864	0	1	Peripherals	k_Archaea	p_Halobacterota	c_Halobacteria	o_Halobacterales	f_Haloferacaceae
OTU_1151	Sediment	-1.02454	0	7	Peripherals	k_Bacteria	p_Bacteroidota	c_Rhodothermia	o_Rhodothermales	f_Rhodothermaceae
OTU_1152	Sediment	1.43857	0	4	Peripherals	k_Bacteria	p_Latescibacterota	c_uncultured__organism	o_uncultured__organism	f_uncultured__bacterium
OTU_1153	Sediment	2.35272	0.203704	5	Peripherals	k_Bacteria	p_Verrucomicrobiota	c_Verrucomicrobiae	o_Opitutales	f_Puniceicoccaceae
OTU_1156	Sediment	-0.357441	0.48	1	Peripherals	k_Bacteria	p_Planctomycetota	c_Planctomycetes	o_Pirellulales	f_Pirellulaceae
OTU_1157	Sediment	1.47796	0	3	Peripherals	k_Bacteria	p_Chloroflexi	c_Anaerolineae	o_Anaerolineales	f_Anaerolineaceae
OTU_116	Sediment	-0.357441	0.48	1	Peripherals	k_Archaea	p_Halobacterota	c_Halobacteria	o_Halobacterales	f_Haloferacaceae
OTU_1161	Sediment	0.977968	0.414062	3	Peripherals	k_Bacteria	p_Acidobacteriota	c_Subgroup__21	o_uncultured__organism	f_uncultured__bacterium
OTU_1166	Sediment	-1	0	12	Peripherals	k_Bacteria	p_Desulfobacterota	c_Desulfobacteria	o_Desulfobacterales	f_Desulfosarcinaceae
OTU_1167	Sediment	-0.57735	0	13	Peripherals	k_Bacteria	p_Desulfobacterota	c_Desulfuromonadia	o_Desulfuromonadaceae	f_Desulfuromonas
OTU_117	Sediment	0.700877	0	2	Peripherals	k_Archaea	p_Halobacterota	c_Halobacteria	o_Halobacterales	f_Haloferacaceae
OTU_1170	Sediment	-0.974483	0.5	6	Peripherals	k_Bacteria	p_Desulfobacterota	c_Desulfobacteria	o_Desulfatiglandales	f_Desulfatiglandaceae
OTU_1173	Sediment	0.577405	0	1	Peripherals	k_Bacteria	p_Bacteroidota	c_Bacteroidia	o_Flavobacteriales	f_Flavobacteriaceae
OTU_1177	Sediment	-0.688666	0	3	Peripherals	k_Bacteria	p_Desulfobacterota	c_Desulfobacteria	o_Desulfobacterales	f_Desulfosarcinaceae
OTU_1178	Sediment	-0.357441	0.375	1	Peripherals	k_Bacteria	p_Bacteroidota	c_Bacteroidia	o_Flavobacteriales	f_Flavobacteriaceae
OTU_1181	Sediment	-0.357441	0.5	1	Peripherals	k_Bacteria	p_Verrucomicrobiota	c_Verrucomicrobiae	o_Opitutales	f_Puniceicoccaceae
OTU_1185	Sediment	-0.824864	0	1	Peripherals	k_Bacteria	p_Myxococcota	c_Myxococcia	o_Myxococcales	f_Myxococcaceae
OTU_1190	Sediment	-1.00125	0	2	Peripherals	k_Bacteria	p_Marinimicrobia__(SAR406__clade)	c_uncultured__organism	o_uncultured__organism	f_uncultured__bacterium
OTU_1194	Sediment	-0.774597	0	9	Peripherals	k_Bacteria	p_Dependentiae	c_Babeliae	o_Babeliales	f_uncultured__organism
OTU_1196	Sediment	-0.12373	0.32	1	Peripherals	k_Bacteria	p_Desulfobacterota	c_Desulfuromonadia	o_Sva1033	f_uncultured__bacterium
OTU_1197	Sediment	1	0	12	Peripherals	k_Bacteria	p_Acidobacteriota	c_Subgroup__22	o_uncultured__organism	f_uncultured__bacterium
OTU_1200	Sediment	0.477978	0	3	Peripherals	k_Bacteria	p_Desulfobacterota	c_Desulfobacteria	o_Desulfobacterales	f_Desulfosarcinaceae
OTU_1202	Sediment	-1.00125	0.5	2	Peripherals	k_Bacteria	p_Latescibacterota	c_uncultured__organism	o_uncultured__organism	f_uncultured__bacterium
OTU_1204	Sediment	-0.855329	0	3	Peripherals	k_Bacteria	p_Proteobacteria	c_Gammaproteobacteria	o_Chromatiales	f_Chromatiaceae
OTU_1206	Sediment	0.477978	0	3	Peripherals	k_Bacteria	p_Desulfobacterota	c_Desulfobulbia	o_Desulfobulbales	f_Desulfobulbaceae
OTU_1209	Sediment	1.14463	0.394464	3	Peripherals	k_Bacteria	p_Acidobacteriota	c_Thermoanaerobaculia	o_Thermoanaerobaculales	f_Thermoanaerobaculaceae
OTU_121	Sediment	0.343693	0.244898	1	Peripherals	k_Archaea	p_Halobacterota	c_Halobacteria	o_Halobacterales	f_Haloferacaceae
OTU_1210	Sediment	-0.591153	0	1	Peripherals	k_Bacteria	p_Planctomycetota	c_Planctomycetes	o_Pirellulales	f_Pirellulaceae
OTU_1214	Sediment	-1.02454	0	7	Peripherals	k_Bacteria	p_Proteobacteria	c_Gammaproteobacteria	o_Ectothiorhodospirales	f_Thioalkalispiraceae
OTU_1215	Sediment	-0.355339	0.32	3	Peripherals	k_Bacteria	p_Desulfobacterota	c_Desulfobacteria	o_Desulfobacterales	f_Desulfococcaceae
OTU_1216	Sediment	-0.0143459	0	5	Peripherals	k_Bacteria	p_Proteobacteria	c_Gammaproteobacteria	o_Nitrococcales	f_Nitrococcaceae
OTU_1218	Sediment	-0.688666	0	3	Peripherals	k_Bacteria	p_Bacteroidota	c_Bacteroidia	o_Flavobacteriales	f_Flavobacteriaceae
OTU_1219	Sediment	-0.875097	0	5	Peripherals	k_Bacteria	p_Proteobacteria	c_Gammaproteobacteria	o_Nitrosococcales	f_Methylophagaceae
OTU_1223	Sediment	0.811305	0	3	Peripherals	k_Bacteria	p_Planctomycetota	c_Planctomycetes	o_Pirellulales	f_Pirellulaceae
OTU_1227	Sediment	-0.418408	0.5	4	Peripherals	k_Bacteria	p_Planctomycetota	c_Planctomycetes	o_Pirellulales	f_Pirellulaceae
OTU_123	Sediment	-0.975502	0	4	Peripherals	k_Archaea	p_Halobacterota	c_Halobacteria	o_Halobacterales	f_Haloferacaceae
OTU_1232	Sediment	-0.0220121	0	3	Peripherals	k_Bacteria	p_Desulfobacterota	c_Desulfobulbia	o_Desulfobulbales	f_Desulfocapsaceae
OTU_1235	Sediment	1.62427	0.33241	4	Peripherals	k_Bacteria	p_Verrucomicrobiota	c_Kiritimatiellae	o_WCHB1-41	f_uncultured__organism
OTU_1236	Sediment	-0.150188	0.444444	2	Peripherals	k_Bacteria	p_Planctomycetota	c_Planctomycetes	o_Pirellulales	f_Pirellulaceae
OTU_1241	Sediment	0.977968	0	3	Peripherals	k_Bacteria	p_Planctomycetota	c_Phycisphaerae	o_MSBL9	f_SG8-4
OTU_1247	Sediment	-0.210183	0.375	6	Peripherals	k_Bacteria	p_Desulfobacterota	c_Desulfobulbia	o_Desulfobulbales	f_Desulfocapsaceae
OTU_1249	Sediment	0.811305	0	3	Peripherals	k_Bacteria	p_Thermotogota	c_Thermotogae	o_Petrotogales	f_Petrotogaceae
OTU_1252	Sediment	0.171968	0.32	6	Peripherals	k_Bacteria	p_Desulfobacterota	c_Desulfobacteria	o_Desulfobacterales	f_Desulfococcaceae
OTU_1253	Sediment	-0.0470121	0.604444	4	Peripherals	k_Bacteria	p_Bacteroidota	c_Bacteroidia	o_Flavobacteriales	f_Flavobacteriaceae
OTU_1254	Sediment	-0.875097	0.5	5	Peripherals	k_Bacteria	p_Desulfobacterota	c_Desulfobacteria	o_Desulfobacterales	f_Desulfosarcinaceae
OTU_1263	Sediment	0.171968	0.571429	6	Peripherals	k_Bacteria	p_Gemmatimonadota	c_BD2-11__terrestrial__group	o_uncultured__organism	f_uncultured__bacterium
OTU_1267	Sediment	-0.355339	0.32	3	Peripherals	k_Bacteria	p_Desulfobacterota	c_Desulfuromonadia	o_Sva1033	f_uncultured__delta__proteobacterium
OTU_1269	Sediment	-0.974483	0.5	6	Peripherals	k_Bacteria	p_Desulfobacterota	c_Desulfobacteria	o_Desulfobacterales	f_Desulfobacteraceae
OTU_1271	Sediment	-0.0220121	0	3	Peripherals	k_Bacteria	p_Caldatribacteriota	c_JS1	o_uncultured__organism	f_uncultured__bacterium
OTU_1284	Sediment	-0.592333	0.625	6	Connectors	k_Bacteria	p_Planctomycetota	c_Planctomycetes	o_Pirellulales	f_Pirellulaceae
OTU_129	Sediment	-1.00125	0	2	Peripherals	k_Archaea	p_Halobacterota	c_Halobacteria	o_Halobacterales	f_Halomicrobiaceae
OTU_1297	Sediment	1.14463	0.320312	3	Peripherals	k_Bacteria	p_Planctomycetota	c_Planctomycetes	o_Pirellulales	f_Pirellulaceae
OTU_1298	Sediment	-0.522002	0.375	3	Peripherals	k_Bacteria	p_Desulfobacterota	c_Desulfuromonadia	o_Geopsychrobacteraceae	f_Malonomonas
OTU_1299	Sediment	-0.975502	0	4	Peripherals	k_Bacteria	p_Verrucomicrobiota	c_Kiritimatiellae	o_WCHB1-41	f_uncultured__organism
OTU_1300	Sediment	-0.229534	0	5	Peripherals	k_Bacteria	p_Bdellovibrionota	c_Bdellovibrionia	o_Bacteriovoracales	f_Bacteriovoracaceae
OTU_1306	Sediment	-0.789804	0	4	Peripherals	k_Bacteria	p_Planctomycetota	c_Phycisphaerae	o_Phycisphaerales	f_Phycisphaeraceae
OTU_1313	Sediment	-0.355339	0	3	Peripherals	k_Bacteria	p_Planctomycetota	c_Phycisphaerae	o_MSBL9	f_4572-13
OTU_1320	Sediment	-0.591153	0	1	Peripherals	k_Bacteria	p_Planctomycetota	c_Phycisphaerae	o_Phycisphaerales	f_Phycisphaeraceae
OTU_1322	Sediment	0.311315	0	3	Peripherals	k_Bacteria	p_Gemmatimonadota	c_BD2-11__terrestrial__group	o_uncultured__Gemmatimonadetes__bacterium	f_uncultured__bacterium
OTU_1351	Sediment	-0.855329	0	3	Peripherals	k_Bacteria	p_Gemmatimonadota	c_BD2-11__terrestrial__group	o_uncultured__bacterium	f_uncultured__bacterium
OTU_1359	Sediment	-0.592333	0	6	Peripherals	k_Bacteria	p_Planctomycetota	c_Pla4__lineage	o_uncultured__organism	f_uncultured__bacterium
OTU_1363	Sediment	0	0	20	Peripherals	k_Bacteria	p_Myxococcota	c_Polyangia	o_Polyangiales	f_Sandaracinaceae
OTU_1367	Sediment	-0.824864	0	1	Peripherals	k_Bacteria	p_Planctomycetota	c_Planctomycetes	o_Pirellulales	f_Pirellulaceae
OTU_1373	Sediment	-0.604106	0.612245	4	Peripherals	k_Bacteria	p_Bdellovibrionota	c_Bdellovibrionia	o_Bacteriovoracales	f_Bacteriovoracaceae
OTU_1376	Sediment	-0.355339	0	3	Peripherals	k_Bacteria	p_Latescibacterota	c_uncultured__Latescibacteria__bacterium	o_uncultured__organism	f_uncultured__bacterium
OTU_1382	Sediment	-0.157622	0	7	Peripherals	k_Bacteria	p_Desulfobacterota	c_Desulfobacteria	o_Desulfobacterales	f_Desulfosarcinaceae
OTU_1386	Sediment	-0.855329	0	3	Peripherals	k_Bacteria	p_Planctomycetota	c_Phycisphaerae	o_Phycisphaerales	f_Phycisphaeraceae
OTU_1390	Sediment	-0.544331	0.5	8	Peripherals	k_Bacteria	p_Proteobacteria	c_Gammaproteobacteria	o_Chromatiales	f_Chromatiaceae
OTU_1399	Sediment	0.881477	0.152778	4	Peripherals	k_Bacteria	p_Planctomycetota	c_Planctomycetes	o_Pirellulales	f_Pirellulaceae
OTU_1402	Sediment	-1.00125	0	2	Peripherals	k_Bacteria	p_Proteobacteria	c_Gammaproteobacteria	o_Nitrococcales	f_Nitrococcaceae
OTU_141	Sediment	1.04483	0.375	1	Peripherals	k_Archaea	p_Halobacterota	c_Halobacteria	o_Halobacterales	f_Halobacteriaceae
OTU_1420	Sediment	-0.875097	0.666667	5	Connectors	k_Bacteria	p_Proteobacteria	c_Gammaproteobacteria	o_Arenicellales	f_Arenicellaceae
OTU_1427	Sediment	-0.544331	0	8	Peripherals	k_Bacteria	p_Myxococcota	c_Polyangia	o_Polyangiales	f_Sandaracinaceae
OTU_1432	Sediment	-1.00125	0	2	Peripherals	k_Bacteria	p_Planctomycetota	c_Phycisphaerae	o_Phycisphaerales	f_AKAU3564__sediment__group
OTU_1447	Sediment	-0.592333	0	6	Peripherals	k_Bacteria	p_Chloroflexi	c_Anaerolineae	o_Ardenticatenales	f_uncultured
OTU_1453	Sediment	2.36706	0	4	Peripherals	k_Bacteria	p_Verrucomicrobiota	c_Kiritimatiellae	o_WCHB1-41	f_uncultured__organism
OTU_1457	Sediment	-0.855329	0	3	Peripherals	k_Bacteria	p_Bdellovibrionota	c_Bdellovibrionia	o_Bdellovibrionales	f_Bdellovibrionaceae
OTU_1464	Sediment	0.258199	0.444444	9	Peripherals	k_Bacteria	p_Desulfobacterota	c_Desulfuromonadia	o_Geopsychrobacteraceae	f_Desulfuromusa
OTU_1471	Sediment	-0.975502	0	4	Peripherals	k_Bacteria	p_Proteobacteria	c_Gammaproteobacteria	o_Ga0077536	f_uncultured__organism
OTU_148	Sediment	-0.824864	0.5	1	Peripherals	k_Archaea	p_Halobacterota	c_Halobacteria	o_Halobacterales	f_Haloferacaceae
OTU_1487	Sediment	-0.974483	0	6	Peripherals	k_Bacteria	p_SAR324__clade(Marine__group__B)	c_uncultured__organism	o_uncultured__organism	f_uncultured__bacterium
OTU_1488	Sediment	-0.824864	0.5	1	Peripherals	k_Bacteria	p_Desulfobacterota	c_Desulfobacteria	o_Desulfobacterales	f_Desulfococcaceae
OTU_1490	Sediment	-0.357441	0.375	1	Peripherals	k_Bacteria	p_Proteobacteria	c_Gammaproteobacteria	o_Tenderiales	f_Tenderiaceae
OTU_1517	Sediment	-0.975502	0	4	Peripherals	k_Bacteria	p_Verrucomicrobiota	c_Kiritimatiellae	o_WCHB1-41	f_uncultured__bacterium
OTU_1537	Sediment	-0.150188	0.64	2	Connectors	k_Bacteria	p_Gemmatimonadota	c_BD2-11__terrestrial__group	o_uncultured__organism	f_uncultured__bacterium
OTU_1570	Sediment	0.144651	0.21875	3	Peripherals	k_Bacteria	p_Proteobacteria	c_Gammaproteobacteria	o_Ectothiorhodospirales	f_Ectothiorhodospiraceae
OTU_1578	Sediment	0	0	16	Peripherals	k_Bacteria	p_Chloroflexi	c_Anaerolineae	o_Anaerolineales	f_Anaerolineaceae
OTU_158	Sediment	-0.418408	0.32	4	Peripherals	k_Archaea	p_Halobacterota	c_Halobacteria	o_Halobacterales	f_Halomicrobiaceae
OTU_159	Sediment	-1.02454	0.5	7	Peripherals	k_Archaea	p_Halobacterota	c_Halobacteria	o_Halobacterales	f_Halomicrobiaceae
OTU_1602	Sediment	-0.688666	0	3	Peripherals	k_Bacteria	p_Desulfobacterota	c_Desulfobacteria	o_Desulfobacterales	f_Desulfosarcinaceae
OTU_1612	Sediment	-0.855329	0	3	Peripherals	k_Bacteria	p_Hydrogenedentes	c_Hydrogenedentia	o_Hydrogenedentiales	f_Hydrogenedensaceae
OTU_1622	Sediment	-0.855329	0	3	Peripherals	k_Bacteria	p_Marinimicrobia__(SAR406__clade)	c_uncultured__bacterium	o_uncultured__organism	f_uncultured__bacterium
OTU_1629	Sediment	-0.789804	0	4	Peripherals	k_Bacteria	p_Hydrogenedentes	c_Hydrogenedentia	o_Hydrogenedentiales	f_Hydrogenedensaceae
OTU_1633	Sediment	0.171968	0.571429	6	Peripherals	k_Bacteria	p_Desulfobacterota	c_Desulfobacteria	o_Desulfobacterales	f_Desulfococcaceae
OTU_1649	Sediment	0	0	14	Peripherals	k_Bacteria	p_WPS-2	c_bacterium__ADurb.Bin236	o_uncultured__organism	f_uncultured__bacterium
OTU_1672	Sediment	-0.688666	0	3	Peripherals	k_Bacteria	p_Acidobacteriota	c_d142	o_uncultured__organism	f_uncultured__bacterium
OTU_1675	Sediment	0.977968	0.337778	3	Peripherals	k_Bacteria	p_Acidobacteriota	c_Thermoanaerobaculia	o_Thermoanaerobaculales	f_Thermoanaerobaculaceae
OTU_1722	Sediment	-0.522002	0	3	Peripherals	k_Bacteria	p_Desulfobacterota	c_Desulfobacteria	o_Desulfobacterales	f_Desulfosarcinaceae
OTU_1727	Sediment	-0.444722	0	5	Peripherals	k_Bacteria	p_Zixibacteria	c_uncultured__organism	o_uncultured__organism	f_uncultured__bacterium
OTU_1737	Sediment	0.136083	0.444444	8	Peripherals	k_Bacteria	p_Verrucomicrobiota	c_Kiritimatiellae	o_WCHB1-41	f_uncultured__bacterium
OTU_179	Sediment	-0.855329	0	3	Peripherals	k_Archaea	p_Halobacterota	c_Halobacteria	o_Halobacterales	f_Halomicrobiaceae
OTU_1829	Sediment	0.144651	0	3	Peripherals	k_Bacteria	p_Desulfobacterota	c_Desulfobacteria	o_Desulfobacterales	f_Desulfosarcinaceae
OTU_1866	Sediment	-0.789804	0	4	Peripherals	k_Bacteria	p_Desulfobacterota	c_Desulfuromonadia	o_Bradymonadales	f_uncultured__organism
OTU_1965	Sediment	-0.355339	0	3	Peripherals	k_Bacteria	p_Desulfobacterota	c_Desulfomonilia	o_Desulfomonilales	f_Desulfomonilaceae
OTU_2012	Sediment	-0.855329	0	3	Peripherals	k_Bacteria	p_Sumerlaeota	c_Sumerlaeia	o_Sumerlaeales	f_Sumerlaeaceae
OTU_2031	Sediment	-0.855329	0	3	Peripherals	k_Bacteria	p_Verrucomicrobiota	c_Kiritimatiellae	o_WCHB1-41	f_uncultured__organism
OTU_2039	Sediment	-0.150188	0	2	Peripherals	k_Bacteria	p_Proteobacteria	c_Gammaproteobacteria	o_Oceanospirillales	f_Alcanivoracaceae1
OTU_2041	Sediment	-0.591153	0.444444	1	Peripherals	k_Bacteria	p_Verrucomicrobiota	c_Verrucomicrobiae	o_Opitutales	f_Puniceicoccaceae
OTU_2107	Sediment	1.97795	0.18	3	Peripherals	k_Bacteria	p_Planctomycetota	c_Planctomycetes	o_Pirellulales	f_Pirellulaceae
OTU_2153	Sediment	-0.774597	0	9	Peripherals	k_Bacteria	p_Proteobacteria	c_Gammaproteobacteria	o_Steroidobacterales	f_Woeseiaceae
OTU_2220	Sediment	-0.544331	0	8	Peripherals	k_Bacteria	p_Desulfobacterota	c_Desulfobacteria	o_Desulfatiglandales	f_Desulfatiglandaceae
OTU_224	Sediment	-0.591153	0.444444	1	Peripherals	k_Archaea	p_Halobacterota	c_Halobacteria	o_Halobacterales	f_Halomicrobiaceae
OTU_2284	Sediment	-0.688666	0.444444	3	Peripherals	k_Bacteria	p_Proteobacteria	c_Gammaproteobacteria	o_HOC36	f_uncultured__organism
OTU_2298	Sediment	2.7831	0	5	Module hubs	k_Bacteria	p_Proteobacteria	c_Gammaproteobacteria	o_Alteromonadales	f_Marinobacteraceae
OTU_230	Sediment	-0.855329	0	3	Peripherals	k_Archaea	p_Halobacterota	c_Halobacteria	o_Halobacterales	f_Haloferacaceae
OTU_2399	Sediment	0.311315	0.34	3	Peripherals	k_Bacteria	p_Desulfobacterota	c_Desulfobacteria	o_Desulfobacterales	f_Desulfobacteraceae
OTU_246	Sediment	-0.875097	0.5	5	Peripherals	k_Bacteria	p_Bacteroidota	c_Bacteroidia	o_Flavobacteriales	f_Flavobacteriaceae
OTU_2480	Sediment	-0.855329	0	3	Peripherals	k_Bacteria	p_Chloroflexi	c_Anaerolineae	o_Anaerolineales	f_Anaerolineaceae
OTU_2613	Sediment	-1.02454	0	7	Peripherals	k_Bacteria	p_Bacteroidota	c_Rhodothermia	o_Rhodothermales	f_Rhodothermaceae
OTU_2648	Sediment	-0.774597	0.5	9	Peripherals	k_Bacteria	p_Proteobacteria	c_Gammaproteobacteria	o_Steroidobacterales	f_Woeseiaceae
OTU_2699	Sediment	-0.875097	0	5	Peripherals	k_Bacteria	p_Proteobacteria	c_Gammaproteobacteria	o_Ectothiorhodospirales	f_Ectothiorhodospiraceae
OTU_2777	Sediment	-0.210183	0.612245	6	Peripherals	k_Bacteria	p_Proteobacteria	c_Gammaproteobacteria	o_Steroidobacterales	f_Woeseiaceae
OTU_2822	Sediment	1.31842	0.545455	6	Peripherals	k_Bacteria	p_Halanaerobiaeota	c_Halanaerobiia	o_Halanaerobiales	f_Halanaerobiaceae
OTU_2824	Sediment	-0.0470121	0.61157	4	Peripherals	k_Bacteria	p_Proteobacteria	c_Alphaproteobacteria	o_Kiloniellales	f_Fodinicurvataceae
OTU_2825	Sediment	0.709299	0.56	7	Peripherals	k_Bacteria	p_Proteobacteria	c_Gammaproteobacteria	o_Steroidobacterales	f_Woeseiaceae
OTU_2826	Sediment	4.08308	0	1	Module hubs	k_Bacteria	p_Proteobacteria	c_Gammaproteobacteria	o_Cellvibrionales	f_Halieaceae
OTU_2827	Sediment	0.510082	0.489796	4	Peripherals	k_Bacteria	p_Proteobacteria	c_Gammaproteobacteria	o_Steroidobacterales	f_Woeseiaceae
OTU_2828	Sediment	-0.418408	0.5	4	Peripherals	k_Bacteria	p_Proteobacteria	c_Gammaproteobacteria	o_Nitrosococcales	f_Nitrosococcaceae
OTU_2829	Sediment	0.695779	0.588235	4	Peripherals	k_Bacteria	p_Proteobacteria	c_Gammaproteobacteria	o_Steroidobacterales	f_Woeseiaceae
OTU_2830	Sediment	-0.522002	0	3	Peripherals	k_Bacteria	p_Proteobacteria	c_Gammaproteobacteria	o_Oceanospirillales	f_Halomonadaceae
OTU_2831	Sediment	-0.592333	0	6	Peripherals	k_Bacteria	p_Halanaerobiaeota	c_Halanaerobiia	o_Halanaerobiales	f_Halanaerobiaceae
OTU_2833	Sediment	-0.688666	0	3	Peripherals	k_Bacteria	p_Proteobacteria	c_Alphaproteobacteria	o_Kiloniellales	f_Fodinicurvataceae
OTU_2836	Sediment	-0.974483	0	6	Peripherals	k_Bacteria	p_Spirochaetota	c_Spirochaetia	o_Spirochaetales	f_Spirochaetaceae
OTU_2837	Sediment	0.709299	0.375	7	Peripherals	k_Bacteria	p_Proteobacteria	c_Gammaproteobacteria	o_Oceanospirillales	f_Halomonadaceae
OTU_2838	Sediment	-0.357441	0.48	1	Peripherals	k_Bacteria	p_Proteobacteria	c_Gammaproteobacteria	o_Oceanospirillales	f_Saccharospirillaceae
OTU_2840	Sediment	-0.0470121	0	4	Peripherals	k_Bacteria	p_Latescibacterota	c_uncultured__organism	o_uncultured__organism	f_uncultured__bacterium
OTU_2842	Sediment	-0.12373	0.64	1	Connectors	k_Bacteria	p_Proteobacteria	c_Alphaproteobacteria	o_Thalassobaculales	f_uncultured
OTU_2844	Sediment	-0.688666	0	3	Peripherals	k_Bacteria	p_Desulfobacterota	c_Desulfovibrionia	o_Desulfovibrionales	f_Desulfohalobiaceae
OTU_2846	Sediment	-0.824864	0	1	Peripherals	k_Bacteria	p_Proteobacteria	c_Gammaproteobacteria	o_SAR86__clade	f_uncultured__gamma__proteobacterium
OTU_2852	Sediment	-0.592333	0.625	6	Connectors	k_Bacteria	p_Bacteroidota	c_Bacteroidia	o_Flavobacteriales	f_Flavobacteriaceae
OTU_2857	Sediment	-0.824864	0.5	1	Peripherals	k_Bacteria	p_Proteobacteria	c_Gammaproteobacteria	o_uncultured	f_uncultured__bacterium
OTU_2858	Sediment	-0.188676	0	3	Peripherals	k_Bacteria	p_Chloroflexi	c_Anaerolineae	o_Anaerolineales	f_Anaerolineaceae
OTU_2862	Sediment	-0.150188	0.444444	2	Peripherals	k_Bacteria	p_Proteobacteria	c_Gammaproteobacteria	o_Cellvibrionales	f_Halieaceae
OTU_2864	Sediment	-0.824864	0	1	Peripherals	k_Bacteria	p_Latescibacterota	c_uncultured__bacterium	o_uncultured__organism	f_uncultured__bacterium
OTU_2865	Sediment	-0.65991	0.625	5	Connectors	k_Bacteria	p_Proteobacteria	c_Gammaproteobacteria	o_KI89A__clade	f_uncultured__bacterium
OTU_2866	Sediment	-0.824864	0.5	1	Peripherals	k_Bacteria	p_Proteobacteria	c_Gammaproteobacteria	o_HOC36	f_uncultured__gamma__proteobacterium
OTU_2867	Sediment	0.936268	0.375	6	Peripherals	k_Bacteria	p_Desulfobacterota	c_Desulfobacteria	o_Desulfobacterales	f_Desulfococcaceae
OTU_2868	Sediment	-0.604106	0.666667	4	Connectors	k_Bacteria	p_Spirochaetota	c_Spirochaetia	o_Spirochaetales	f_Spirochaetaceae
OTU_2871	Sediment	-0.875097	0.5	5	Peripherals	k_Bacteria	p_Proteobacteria	c_Gammaproteobacteria	o_Arenicellales	f_Arenicellaceae
OTU_2873	Sediment	-0.12373	0.32	1	Peripherals	k_Bacteria	p_Proteobacteria	c_Alphaproteobacteria	o_Thalassobaculales	f_uncultured
OTU_2874	Sediment	0.811305	0.635	3	Connectors	k_Bacteria	p_Halanaerobiaeota	c_Halanaerobiia	o_Halanaerobiales	f_Halanaerobiaceae
OTU_2877	Sediment	-0.229534	0	5	Peripherals	k_Bacteria	p_Proteobacteria	c_Alphaproteobacteria	o_Thalassobaculales	f_uncultured
OTU_2879	Sediment	0.709299	0	7	Peripherals	k_Bacteria	p_Desulfobacterota	c_Desulfuromonadia	o_Bradymonadales	f_Bradymonadaceae
OTU_2880	Sediment	1.57622	0	7	Peripherals	k_Bacteria	p_Proteobacteria	c_Alphaproteobacteria	o_Kiloniellales	f_Fodinicurvataceae
OTU_2885	Sediment	-0.688666	0.444444	3	Peripherals	k_Bacteria	p_Halanaerobiaeota	c_Halanaerobiia	o_Halanaerobiales	f_Halobacteroidaceae
OTU_2894	Sediment	0.311315	0	3	Peripherals	k_Bacteria	p_Proteobacteria	c_Alphaproteobacteria	o_Kiloniellales	f_Fodinicurvataceae
OTU_2898	Sediment	1.97967	0.132653	1	Peripherals	k_Bacteria	p_Proteobacteria	c_Alphaproteobacteria	o_Thalassobaculales	f_uncultured
OTU_2901	Sediment	-0.824864	0	1	Peripherals	k_Bacteria	p_Proteobacteria	c_Gammaproteobacteria	o_Oceanospirillales	f_Pseudohongiellaceae
OTU_2904	Sediment	-0.150188	0	2	Peripherals	k_Bacteria	p_Proteobacteria	c_Gammaproteobacteria	o_Oceanospirillales	f_Nitrincolaceae
OTU_2906	Sediment	-0.824864	0	1	Peripherals	k_Bacteria	p_Proteobacteria	c_Alphaproteobacteria	o_Alphaproteobacteria__Incertae__Sedis	f_Unknown__Family
OTU_2907	Sediment	1.55194	0.59375	2	Peripherals	k_Bacteria	p_Proteobacteria	c_Alphaproteobacteria	o_Rhodobacterales	f_Rhodobacteraceae
OTU_2918	Sediment	-1	0	12	Peripherals	k_Bacteria	p_Desulfobacterota	c_Desulfovibrionia	o_Desulfovibrionales	f_Desulfohalobiaceae
OTU_2920	Sediment	-0.150188	0.444444	2	Peripherals	k_Bacteria	p_Proteobacteria	c_Alphaproteobacteria	o_Rhodobacterales	f_Rhodobacteraceae
OTU_2938	Sediment	-0.855329	0	3	Peripherals	k_Bacteria	p_Bacteroidota	c_Bacteroidia	o_Chitinophagales	f_Saprospiraceae
OTU_2947	Sediment	-0.0143459	0.277778	5	Peripherals	k_Bacteria	p_Proteobacteria	c_Gammaproteobacteria	o_Alteromonadales	f_Marinobacteraceae
OTU_2966	Sediment	-0.875097	0	5	Peripherals	k_Bacteria	p_Proteobacteria	c_Alphaproteobacteria	o_Thalassobaculales	f_uncultured
OTU_2982	Sediment	0.144651	0	3	Peripherals	k_Bacteria	p_Halanaerobiaeota	c_Halanaerobiia	o_Halanaerobiales	f_Halanaerobiaceae
OTU_2987	Sediment	0.343693	0.244898	1	Peripherals	k_Bacteria	p_Proteobacteria	c_Gammaproteobacteria	o_OM182__clade	f_uncultured__bacterium
OTU_2994	Sediment	-0.974483	0	6	Peripherals	k_Bacteria	p_Proteobacteria	c_Gammaproteobacteria	o_Nitrosococcales	f_Nitrosococcaceae
OTU_2995	Sediment	-0.522002	0	3	Peripherals	k_Bacteria	p_Spirochaetota	c_Spirochaetia	o_Spirochaetales	f_Spirochaetaceae
OTU_3095	Sediment	-0.65991	0	5	Peripherals	k_Bacteria	p_Verrucomicrobiota	c_Verrucomicrobiae	o_Opitutales	f_Puniceicoccaceae
OTU_3107	Sediment	1.04483	0.540816	1	Peripherals	k_Bacteria	p_Proteobacteria	c_Alphaproteobacteria	o_Rhodobacterales	f_Rhodobacteraceae
OTU_3109	Sediment	-0.12373	0	1	Peripherals	k_Bacteria	p_Desulfobacterota	c_Desulfuromonadia	o_Bradymonadales	f_uncultured__bacterium
OTU_3174	Sediment	-0.150188	0	2	Peripherals	k_Bacteria	p_Desulfobacterota	c_Desulfobulbia	o_Desulfobulbales	f_Desulfobulbaceae
OTU_3204	Sediment	0.109982	0.277778	1	Peripherals	k_Bacteria	p_Proteobacteria	c_Gammaproteobacteria	o_Steroidobacterales	f_Woeseiaceae
OTU_3211	Sediment	0.171968	0.727273	6	Connectors	k_Bacteria	p_Proteobacteria	c_Gammaproteobacteria	o_Nitrosococcales	f_Nitrosococcaceae
OTU_3214	Sediment	-0.12373	0.489796	1	Peripherals	k_Bacteria	p_Proteobacteria	c_Gammaproteobacteria	o_Gammaproteobacteria__Incertae__Sedis	f_Unknown__Family
OTU_3260	Sediment	-0.210183	0.611111	6	Peripherals	k_Bacteria	p_Desulfobacterota	c_Desulfovibrionia	o_Desulfovibrionales	f_Desulfohalobiaceae
OTU_3261	Sediment	0.171968	0.32	6	Peripherals	k_Bacteria	p_Bacteroidota	c_Bacteroidia	o_Flavobacteriales	f_Flavobacteriaceae
OTU_3292	Sediment	-0.357441	0.375	1	Peripherals	k_Bacteria	p_Proteobacteria	c_Alphaproteobacteria	o_Rhodobacterales	f_Rhodobacteraceae
OTU_3298	Sediment	0.138686	0.21875	4	Peripherals	k_Bacteria	p_Proteobacteria	c_Gammaproteobacteria	o_Gammaproteobacteria__Incertae__Sedis	f_Unknown__Family
OTU_3301	Sediment	1	0	12	Peripherals	k_Bacteria	p_Proteobacteria	c_Alphaproteobacteria	o_Sphingomonadales	f_Sphingomonadaceae
OTU_3303	Sediment	-0.789804	0	4	Peripherals	k_Bacteria	p_Proteobacteria	c_Gammaproteobacteria	o_Gammaproteobacteria__Incertae__Sedis	f_Unknown__Family
OTU_3306	Sediment	-0.12373	0	1	Peripherals	k_Bacteria	p_Actinobacteriota	c_Actinobacteria	o_Nitriliruptorales	f_Nitriliruptoraceae
OTU_3334	Sediment	1.43857	0.226562	4	Peripherals	k_Bacteria	p_Spirochaetota	c_Spirochaetia	o_Spirochaetales	f_Spirochaetaceae
OTU_3338	Sediment	0.109982	0.44898	1	Peripherals	k_Bacteria	p_Actinobacteriota	c_Actinobacteria	o_Nitriliruptorales	f_Nitriliruptoraceae
OTU_3339	Sediment	-0.975502	0	4	Peripherals	k_Bacteria	p_Proteobacteria	c_Alphaproteobacteria	o_Thalassobaculales	f_uncultured
OTU_3348	Sediment	-0.824864	0	1	Peripherals	k_Bacteria	p_Proteobacteria	c_Alphaproteobacteria	o_Rhodobacterales	f_Rhodobacteraceae
OTU_3394	Sediment	-0.150188	0	2	Peripherals	k_Bacteria	p_Proteobacteria	c_Gammaproteobacteria	o_Cellvibrionales	f_Halieaceae
OTU_3401	Sediment	-0.591153	0.64	1	Connectors	k_Bacteria	p_Latescibacterota	c_uncultured__organism	o_uncultured__organism	f_uncultured__bacterium
OTU_3407	Sediment	0.554118	0.5625	6	Peripherals	k_Bacteria	p_Proteobacteria	c_Gammaproteobacteria	o_Steroidobacterales	f_Woeseiaceae
OTU_3420	Sediment	0.977968	0	3	Peripherals	k_Bacteria	p_Proteobacteria	c_Gammaproteobacteria	o_Steroidobacterales	f_Woeseiaceae
OTU_3446	Sediment	-0.544331	0	8	Peripherals	k_Bacteria	p_Bacteroidota	c_Bacteroidia	o_Cytophagales	f_Cyclobacteriaceae
OTU_3451	Sediment	-0.824864	0	1	Peripherals	k_Bacteria	p_Proteobacteria	c_Alphaproteobacteria	o_Rhodobacterales	f_Rhodobacteraceae
OTU_3454	Sediment	0	0	15	Peripherals	k_Bacteria	p_Proteobacteria	c_Gammaproteobacteria	o_Steroidobacterales	f_Woeseiaceae
OTU_3455	Sediment	-0.855329	0	3	Peripherals	k_Bacteria	p_Desulfobacterota	c_Desulfobacteria	o_Desulfobacterales	f_Desulfococcaceae
OTU_3479	Sediment	0.477978	0.18	3	Peripherals	k_Bacteria	p_Desulfobacterota	c_Desulfovibrionia	o_Desulfovibrionales	f_Desulfohalobiaceae
OTU_3521	Sediment	-0.875097	0	5	Peripherals	k_Bacteria	p_Proteobacteria	c_Gammaproteobacteria	o_Oceanospirillales	f_Alcanivoracaceae1
OTU_3562	Sediment	-0.591153	0.444444	1	Peripherals	k_Bacteria	p_Proteobacteria	c_Alphaproteobacteria	o_Rhodobacterales	f_Rhodobacteraceae
OTU_3567	Sediment	0.136083	0.5	8	Peripherals	k_Bacteria	p_Bacteroidota	c_Rhodothermia	o_Rhodothermales	f_Rhodothermaceae
OTU_3568	Sediment	3.61565	0	1	Module hubs	k_Bacteria	p_Proteobacteria	c_Alphaproteobacteria	o_Rhodobacterales	f_Rhodobacteraceae
OTU_3569	Sediment	0.881477	0.357143	4	Peripherals	k_Bacteria	p_Spirochaetota	c_Spirochaetia	o_Spirochaetales	f_Spirochaetaceae
OTU_3570	Sediment	-0.0220121	0.444444	3	Peripherals	k_Bacteria	p_Proteobacteria	c_Alphaproteobacteria	o_Rhodobacterales	f_Rhodobacteraceae
OTU_3571	Sediment	-0.592333	0.722222	6	Connectors	k_Bacteria	p_Proteobacteria	c_Alphaproteobacteria	o_Tistrellales	f_Geminicoccaceae
OTU_3572	Sediment	-0.65991	0	5	Peripherals	k_Bacteria	p_Proteobacteria	c_Alphaproteobacteria	o_Rhodobacterales	f_Rhodobacteraceae
OTU_3573	Sediment	-0.592333	0.625	6	Connectors	k_Bacteria	p_Planctomycetota	c_Planctomycetes	o_Planctomycetales	f_Gimesiaceae
OTU_3574	Sediment	0.695779	0	4	Peripherals	k_Bacteria	p_Proteobacteria	c_Gammaproteobacteria	o_HOC36	f_uncultured__organism
OTU_3575	Sediment	2.18136	0.244898	4	Peripherals	k_Bacteria	p_Spirochaetota	c_Spirochaetia	o_Spirochaetales	f_Spirochaetaceae
OTU_3576	Sediment	-0.875097	0.5	5	Peripherals	k_Bacteria	p_Proteobacteria	c_Alphaproteobacteria	o_Rhodobacterales	f_Rhodobacteraceae
OTU_3578	Sediment	-0.688666	0	3	Peripherals	k_Bacteria	p_Planctomycetota	c_Planctomycetes	o_Planctomycetales	f_Gimesiaceae
OTU_3579	Sediment	-0.604106	0.375	4	Peripherals	k_Bacteria	p_Desulfobacterota	c_Desulfovibrionia	o_Desulfovibrionales	f_Desulfovibrionaceae
OTU_3580	Sediment	1.55194	0.571429	2	Peripherals	k_Bacteria	p_Proteobacteria	c_Alphaproteobacteria	o_Rhodobacterales	f_Rhodobacteraceae
OTU_3581	Sediment	-0.65991	0	5	Peripherals	k_Bacteria	p_Proteobacteria	c_Alphaproteobacteria	o_Defluviicoccales	f_uncultured
OTU_3582	Sediment	2.46487	0	6	Peripherals	k_Bacteria	p_Proteobacteria	c_Alphaproteobacteria	o_Rhodobacterales	f_Rhodobacteraceae
OTU_3584	Sediment	3.38194	0.287335	1	Module hubs	k_Bacteria	p_Proteobacteria	c_Alphaproteobacteria	o_Rhodobacterales	f_Rhodobacteraceae
OTU_3586	Sediment	1.27854	0.62	1	Peripherals	k_Bacteria	p_Proteobacteria	c_Alphaproteobacteria	o_Rhodobacterales	f_Rhodobacteraceae
OTU_3588	Sediment	0.631218	0.197531	5	Peripherals	k_Bacteria	p_Spirochaetota	c_Spirochaetia	o_Spirochaetales	f_Spirochaetaceae
OTU_3589	Sediment	0.109982	0	1	Peripherals	k_Bacteria	p_Proteobacteria	c_Alphaproteobacteria	o_Rhodobacterales	f_Rhodobacteraceae
OTU_3590	Sediment	-0.591153	0.64	1	Connectors	k_Bacteria	p_Spirochaetota	c_Spirochaetia	o_Spirochaetales	f_Spirochaetaceae
OTU_3591	Sediment	-0.688666	0.444444	3	Peripherals	k_Bacteria	p_Proteobacteria	c_Alphaproteobacteria	o_Rhodobacterales	f_Rhodobacteraceae
OTU_3595	Sediment	-0.875097	0	5	Peripherals	k_Bacteria	p_Proteobacteria	c_Alphaproteobacteria	o_Rhodobacterales	f_Rhodobacteraceae
OTU_3597	Sediment	-0.75	0	10	Peripherals	k_Bacteria	p_Proteobacteria	c_Gammaproteobacteria	o_Thiotrichales	f_Thiotrichaceae
OTU_3598	Sediment	4.64456	0.0555102	3	Module hubs	k_Bacteria	p_Proteobacteria	c_Alphaproteobacteria	o_Rhodobacterales	f_Rhodobacteraceae
OTU_3599	Sediment	-0.188676	0.408163	3	Peripherals	k_Bacteria	p_Proteobacteria	c_Alphaproteobacteria	o_Rhodobacterales	f_Rhodobacteraceae
OTU_3600	Sediment	1.97967	0	1	Peripherals	k_Bacteria	p_Proteobacteria	c_Alphaproteobacteria	o_Rhodobacterales	f_Rhodobacteraceae
OTU_3602	Sediment	-0.157622	0.444444	7	Peripherals	k_Bacteria	p_Desulfobacterota	c_Desulfuromonadia	o_Bradymonadales	f_Bradymonadaceae
OTU_3605	Sediment	3.14459	0.0739645	3	Module hubs	k_Bacteria	p_Proteobacteria	c_Alphaproteobacteria	o_Rhodobacterales	f_Rhodobacteraceae
OTU_3606	Sediment	-0.188676	0	3	Peripherals	k_Bacteria	p_Proteobacteria	c_Alphaproteobacteria	o_Rhodobacterales	f_Rhodobacteraceae
OTU_3607	Sediment	1.57622	0.5	7	Peripherals	k_Bacteria	p_Proteobacteria	c_Alphaproteobacteria	o_uncultured	f_uncultured__organism
OTU_3608	Sediment	-0.0143459	0	5	Peripherals	k_Bacteria	p_Proteobacteria	c_Alphaproteobacteria	o_Rhodobacterales	f_Rhodobacteraceae
OTU_3609	Sediment	0.709299	0.375	7	Peripherals	k_Bacteria	p_Bacteroidota	c_Rhodothermia	o_Rhodothermales	f_Rhodothermaceae
OTU_3610	Sediment	0.977968	0.526077	3	Peripherals	k_Bacteria	p_Bacteroidota	c_Rhodothermia	o_Balneolales	f_Balneolaceae
OTU_3611	Sediment	0.343693	0	1	Peripherals	k_Bacteria	p_Proteobacteria	c_Alphaproteobacteria	o_Rhodobacterales	f_Rhodobacteraceae
OTU_3615	Sediment	-0.824864	0.5	1	Peripherals	k_Bacteria	p_Proteobacteria	c_Alphaproteobacteria	o_Caulobacterales	f_Hyphomonadaceae
OTU_3616	Sediment	2.84702	0.426667	6	Module hubs	k_Bacteria	p_Spirochaetota	c_Spirochaetia	o_Spirochaetales	f_Spirochaetaceae
OTU_3617	Sediment	-0.210183	0.375	6	Peripherals	k_Bacteria	p_Spirochaetota	c_Spirochaetia	o_Spirochaetales	f_Spirochaetaceae
OTU_3619	Sediment	-0.157622	0.625	7	Connectors	k_Bacteria	p_Proteobacteria	c_Alphaproteobacteria	o_Rhizobiales	f_Hyphomicrobiaceae
OTU_3621	Sediment	0.324384	0.32	4	Peripherals	k_Bacteria	p_Spirochaetota	c_Spirochaetia	o_Spirochaetales	f_Spirochaetaceae
OTU_3625	Sediment	-1.00125	0	2	Peripherals	k_Bacteria	p_Proteobacteria	c_Alphaproteobacteria	o_Rhodobacterales	f_Rhodobacteraceae
OTU_3631	Sediment	-0.157622	0	7	Peripherals	k_Bacteria	p_Proteobacteria	c_Alphaproteobacteria	o_Rhodobacterales	f_Rhodobacteraceae
OTU_3634	Sediment	-0.12373	0	1	Peripherals	k_Bacteria	p_Proteobacteria	c_Alphaproteobacteria	o_Rhodobacterales	f_Rhodobacteraceae
OTU_3635	Sediment	-0.444722	0	5	Peripherals	k_Bacteria	p_Planctomycetota	c_Planctomycetes	o_Planctomycetales	f_Rubinisphaeraceae
OTU_3638	Sediment	2.21339	0.124444	1	Peripherals	k_Bacteria	p_Proteobacteria	c_Alphaproteobacteria	o_Rhodobacterales	f_Rhodobacteraceae
OTU_3639	Sediment	-0.229534	0	5	Peripherals	k_Bacteria	p_Proteobacteria	c_Alphaproteobacteria	o_Rhodobacterales	f_Rhodobacteraceae
OTU_3640	Sediment	-0.875097	0	5	Peripherals	k_Bacteria	p_Proteobacteria	c_Alphaproteobacteria	o_Rhodobacterales	f_Rhodobacteraceae
OTU_3641	Sediment	-0.544331	0	8	Peripherals	k_Bacteria	p_Proteobacteria	c_Alphaproteobacteria	o_Rhizobiales	f_Rhizobiales__Incertae__Sedis
OTU_3644	Sediment	-0.65991	0	5	Peripherals	k_Bacteria	p_Proteobacteria	c_Alphaproteobacteria	o_Rhodobacterales	f_Rhodobacteraceae
OTU_3651	Sediment	-0.357441	0	1	Peripherals	k_Bacteria	p_Proteobacteria	c_Alphaproteobacteria	o_Rhodobacterales	f_Rhodobacteraceae
OTU_3656	Sediment	0.477978	0	3	Peripherals	k_Bacteria	p_Bacteroidota	c_Ignavibacteria	o_Ignavibacteriales	f_Melioribacteraceae
OTU_3660	Sediment	-0.229534	0.5	5	Peripherals	k_Bacteria	p_Proteobacteria	c_Alphaproteobacteria	o_Rhizobiales	f_Beijerinckiaceae
OTU_3664	Sediment	-0.447214	0	11	Peripherals	k_Bacteria	p_Spirochaetota	c_Spirochaetia	o_Spirochaetales	f_Spirochaetaceae
OTU_3665	Sediment	-0.23271	0	4	Peripherals	k_Bacteria	p_Proteobacteria	c_Alphaproteobacteria	o_Micavibrionales	f_Micavibrionaceae
OTU_3669	Sediment	1.06159	0.560554	5	Peripherals	k_Bacteria	p_Bacteroidota	c_Rhodothermia	o_Balneolales	f_Balneolaceae
OTU_3677	Sediment	-0.357441	0	1	Peripherals	k_Bacteria	p_Proteobacteria	c_Alphaproteobacteria	o_Rhodobacterales	f_Rhodobacteraceae
OTU_3684	Sediment	0.343693	0	1	Peripherals	k_Bacteria	p_Proteobacteria	c_Alphaproteobacteria	o_Rhodobacterales	f_Rhodobacteraceae
OTU_3693	Sediment	-0.975502	0	4	Peripherals	k_Bacteria	p_Acidobacteriota	c_Acidobacteriae	o_PAUC26f	f_uncultured__organism
OTU_3703	Sediment	0.109982	0	1	Peripherals	k_Bacteria	p_Spirochaetota	c_Spirochaetia	o_Spirochaetales	f_Spirochaetaceae
OTU_3712	Sediment	-0.357441	0	1	Peripherals	k_Bacteria	p_Planctomycetota	c_Planctomycetes	o_Planctomycetales	f_Rubinisphaeraceae
OTU_3720	Sediment	-0.789804	0	4	Peripherals	k_Bacteria	p_Proteobacteria	c_Alphaproteobacteria	o_Rhodobacterales	f_Rhodobacteraceae
OTU_3730	Sediment	-0.824864	0	1	Peripherals	k_Bacteria	p_Proteobacteria	c_Alphaproteobacteria	o_Rhizobiales	f_Rhizobiaceae
OTU_3735	Sediment	-0.855329	0	3	Peripherals	k_Bacteria	p_Proteobacteria	c_Alphaproteobacteria	o_Rhodobacterales	f_Rhodobacteraceae
OTU_3749	Sediment	0.171968	0.571429	6	Peripherals	k_Bacteria	p_Spirochaetota	c_Spirochaetia	o_Spirochaetales	f_Spirochaetaceae
OTU_3771	Sediment	1.06159	0.165289	5	Peripherals	k_Bacteria	p_Proteobacteria	c_Alphaproteobacteria	o_Rhodospirillales	f_uncultured
OTU_3777	Sediment	-0.157622	0	7	Peripherals	k_Bacteria	p_Proteobacteria	c_Alphaproteobacteria	o_Rhodobacterales	f_Rhodobacteraceae
OTU_3787	Sediment	0.109982	0	1	Peripherals	k_Bacteria	p_Proteobacteria	c_Alphaproteobacteria	o_Rhodobacterales	f_Rhodobacteraceae
OTU_3789	Sediment	-0.855329	0	3	Peripherals	k_Bacteria	p_Spirochaetota	c_Spirochaetia	o_Spirochaetales	f_Spirochaetaceae
OTU_3811	Sediment	-0.444722	0	5	Peripherals	k_Bacteria	p_Proteobacteria	c_Alphaproteobacteria	o_uncultured	f_uncultured__organism
OTU_3825	Sediment	0.343693	0	1	Peripherals	k_Bacteria	p_Proteobacteria	c_Alphaproteobacteria	o_Rhodobacterales	f_Rhodobacteraceae
OTU_3891	Sediment	0	0	20	Peripherals	k_Bacteria	p_Proteobacteria	c_Alphaproteobacteria	o_Rhodobacterales	f_Rhodobacteraceae
OTU_3903	Sediment	0	0	19	Peripherals	k_Bacteria	p_Proteobacteria	c_Alphaproteobacteria	o_Rhodobacterales	f_Rhodobacteraceae
OTU_3946	Sediment	0	0	18	Peripherals	k_Bacteria	p_Proteobacteria	c_Alphaproteobacteria	o_Rhodobacterales	f_Rhodobacteraceae
OTU_3953	Sediment	-0.418408	0	4	Peripherals	k_Bacteria	p_Bacteroidota	c_Rhodothermia	o_Balneolales	f_Balneolaceae
OTU_3957	Sediment	0.109982	0.408163	1	Peripherals	k_Bacteria	p_Spirochaetota	c_Spirochaetia	o_Spirochaetales	f_Spirochaetaceae
OTU_3966	Sediment	1.27854	0	1	Peripherals	k_Bacteria	p_Proteobacteria	c_Alphaproteobacteria	o_Rhodobacterales	f_Rhodobacteraceae
OTU_3969	Sediment	-0.357441	0	1	Peripherals	k_Bacteria	p_Proteobacteria	c_Alphaproteobacteria	o_Rhodobacterales	f_Rhodobacteraceae
OTU_3971	Sediment	-0.824864	0	1	Peripherals	k_Bacteria	p_Proteobacteria	c_Alphaproteobacteria	o_Rhodobacterales	f_Rhodobacteraceae
OTU_3982	Sediment	-0.974483	0	6	Peripherals	k_Bacteria	p_Proteobacteria	c_Gammaproteobacteria	o_Steroidobacterales	f_Woeseiaceae
OTU_4047	Sediment	-0.824864	0	1	Peripherals	k_Bacteria	p_Proteobacteria	c_Alphaproteobacteria	o_Rhodobacterales	f_Rhodobacteraceae
OTU_4051	Sediment	-0.522002	0	3	Peripherals	k_Bacteria	p_Proteobacteria	c_Alphaproteobacteria	o_Rhodobacterales	f_Rhodobacteraceae
OTU_4057	Sediment	-0.447214	0	11	Peripherals	k_Bacteria	p_Proteobacteria	c_Alphaproteobacteria	o_Rhodobacterales	f_Rhodobacteraceae
OTU_4100	Sediment	0.343693	0	1	Peripherals	k_Bacteria	p_Proteobacteria	c_Alphaproteobacteria	o_Rhodobacterales	f_Rhodobacteraceae
OTU_4102	Sediment	-0.604106	0.48	4	Peripherals	k_Bacteria	p_Proteobacteria	c_Alphaproteobacteria	o_Rhodobacterales	f_Rhodobacteraceae
OTU_4143	Sediment	0.144651	0	3	Peripherals	k_Bacteria	p_Bacteroidota	c_Bacteroidia	o_Bacteroidales	f_Marinilabiliaceae
OTU_4145	Sediment	-0.12373	0	1	Peripherals	k_Bacteria	p_Bacteroidota	c_Bacteroidia	o_Chitinophagales	f_Saprospiraceae
OTU_4148	Sediment	-0.210183	0	6	Peripherals	k_Bacteria	p_Spirochaetota	c_Spirochaetia	o_Spirochaetales	f_Spirochaetaceae
OTU_4149	Sediment	0.644641	0	3	Peripherals	k_Bacteria	p_Bacteroidota	c_Bacteroidia	o_Bacteroidales	f_Prolixibacteraceae
OTU_4150	Sediment	0.138686	0.21875	4	Peripherals	k_Bacteria	p_Bacteroidota	c_Bacteroidia	o_Cytophagales	f_Cyclobacteriaceae
OTU_4151	Sediment	3.47792	0	3	Module hubs	k_Bacteria	p_Bacteroidota	c_Bacteroidia	o_Bacteroidales	f_Marinilabiliaceae
OTU_4152	Sediment	0.644641	0	3	Peripherals	k_Bacteria	p_Bacteroidota	c_Bacteroidia	o_Bacteroidales	f_Marinilabiliaceae
OTU_4155	Sediment	-1.02454	0.5	7	Peripherals	k_Bacteria	p_Bacteroidota	c_Bacteroidia	o_Chitinophagales	f_uncultured
OTU_4161	Sediment	-0.23271	0	4	Peripherals	k_Bacteria	p_Spirochaetota	c_Spirochaetia	o_Spirochaetales	f_Spirochaetaceae
OTU_4163	Sediment	-0.23271	0.408163	4	Peripherals	k_Bacteria	p_Proteobacteria	c_Alphaproteobacteria	o_Rhodospirillales	f_Terasakiellaceae
OTU_4173	Sediment	-0.855329	0	3	Peripherals	k_Bacteria	p_Bacteroidota	c_Rhodothermia	o_Balneolales	f_Balneolaceae
OTU_4193	Sediment	-0.824864	0	1	Peripherals	k_Bacteria	p_Bacteroidota	c_Bacteroidia	o_Flavobacteriales	f_Cryomorphaceae
OTU_4196	Sediment	-0.875097	0	5	Peripherals	k_Bacteria	p_Proteobacteria	c_Alphaproteobacteria	o_Rhodospirillales	f_Terasakiellaceae
OTU_4206	Sediment	-0.604106	0	4	Peripherals	k_Bacteria	p_Bacteroidota	c_Kapabacteria	o_Kapabacteriales	f_uncultured__organism
OTU_4223	Sediment	0.41603	0.21875	5	Peripherals	k_Bacteria	p_Bacteroidota	c_Rhodothermia	o_Balneolales	f_Balneolaceae
OTU_4243	Sediment	-0.522002	0	3	Peripherals	k_Bacteria	p_Bacteroidota	c_Kapabacteria	o_Kapabacteriales	f_uncultured__organism
OTU_4251	Sediment	-0.0470121	0	4	Peripherals	k_Bacteria	p_Bacteroidota	c_Rhodothermia	o_Rhodothermales	f_Rhodothermaceae
OTU_4258	Sediment	-0.688666	0	3	Peripherals	k_Bacteria	p_Bacteroidota	c_Kapabacteria	o_Kapabacteriales	f_uncultured__organism
OTU_4304	Sediment	-0.974483	0	6	Peripherals	k_Bacteria	p_Bacteroidota	c_Bacteroidia	o_Cytophagales	f_Amoebophilaceae
OTU_4329	Sediment	-0.975502	0	4	Peripherals	k_Bacteria	p_Bacteroidota	c_Bacteroidia	o_Chitinophagales	f_uncultured
OTU_4337	Sediment	0.811116	0.49827	1	Peripherals	k_Bacteria	p_Deinococcota	c_Deinococci	o_Deinococcales	f_Trueperaceae
OTU_4339	Sediment	1.43857	0	4	Peripherals	k_Bacteria	p_Bacteroidota	c_Rhodothermia	o_Balneolales	f_Balneolaceae
OTU_4354	Sediment	2.32379	0	9	Peripherals	k_Bacteria	p_Bacteroidota	c_Rhodothermia	o_Balneolales	f_Balneolaceae
OTU_4413	Sediment	0.846406	0.18	5	Peripherals	k_Bacteria	p_Bacteroidota	c_Rhodothermia	o_Balneolales	f_Balneolaceae
OTU_4418	Sediment	1.27678	0.152778	5	Peripherals	k_Bacteria	p_Deinococcota	c_Deinococci	o_Deinococcales	f_Trueperaceae
OTU_4419	Sediment	-0.824864	0	1	Peripherals	k_Bacteria	p_Bacteroidota	c_Bacteroidia	o_Flavobacteriales	f_Flavobacteriaceae
OTU_4420	Sediment	1.92235	0.124444	5	Peripherals	k_Bacteria	p_Bacteroidota	c_Rhodothermia	o_Balneolales	f_Balneolaceae
OTU_4424	Sediment	0.700877	0.375	2	Peripherals	k_Bacteria	p_Bacteroidota	c_Bacteroidia	o_Flavobacteriales	f_Flavobacteriaceae
OTU_4425	Sediment	0.200842	0.244898	5	Peripherals	k_Bacteria	p_Bacteroidota	c_Bacteroidia	o_Flavobacteriales	f_Crocinitomicaceae
OTU_4427	Sediment	0.258199	0	9	Peripherals	k_Bacteria	p_Bacteroidota	c_Bacteroidia	o_Cytophagales	f_Cyclobacteriaceae
OTU_4428	Sediment	1.25287	0.304688	4	Peripherals	k_Bacteria	p_Bacteroidota	c_Bacteroidia	o_Bacteroidales	f_ML635J-40__aquatic__group
OTU_4429	Sediment	0	0	17	Peripherals	k_Bacteria	p_Bacteroidota	c_Bacteroidia	o_Bacteroidales	f_Marinilabiliaceae
OTU_4431	Sediment	0.709299	0	7	Peripherals	k_Bacteria	p_Bacteroidota	c_Rhodothermia	o_Balneolales	f_Balneolaceae
OTU_4435	Sediment	0.138686	0.37037	4	Peripherals	k_Bacteria	p_Bacteroidota	c_Bacteroidia	o_Bacteroidales	f_SB-5
OTU_4436	Sediment	2.81127	0.1504	3	Module hubs	k_Bacteria	p_Bacteroidota	c_Bacteroidia	o_Bacteroidales	f_Bacteroidetes__BD2-2
OTU_4437	Sediment	0.144651	0	3	Peripherals	k_Bacteria	p_Bacteroidota	c_Bacteroidia	o_Bacteroidales	f_Marinilabiliaceae
OTU_4440	Sediment	0.554118	0.277778	6	Peripherals	k_Bacteria	p_Bacteroidota	c_Bacteroidia	o_Flavobacteriales	f_Cryomorphaceae
OTU_4443	Sediment	0.700877	0	2	Peripherals	k_Bacteria	p_Bacteroidota	c_Bacteroidia	o_Bacteroidales	f_Prolixibacteraceae
OTU_4444	Sediment	-0.355339	0	3	Peripherals	k_Bacteria	p_Bacteroidota	c_Bacteroidia	o_Flavobacteriales	f_Flavobacteriaceae
OTU_4445	Sediment	0.109982	0	1	Peripherals	k_Bacteria	p_Bacteroidota	c_Bacteroidia	o_Chitinophagales	f_uncultured
OTU_4447	Sediment	0.577405	0.21875	1	Peripherals	k_Bacteria	p_Bacteroidota	c_Bacteroidia	o_Chitinophagales	f_uncultured
OTU_4450	Sediment	-0.210183	0.375	6	Peripherals	k_Bacteria	p_Bacteroidota	c_Bacteroidia	o_Cytophagales	f_Cyclobacteriaceae
OTU_4455	Sediment	-0.23271	0.408163	4	Peripherals	k_Bacteria	p_Bacteroidota	c_Bacteroidia	o_Sphingobacteriales	f_E6aC02
OTU_4457	Sediment	-0.444722	0	5	Peripherals	k_Bacteria	p_Bacteroidota	c_Bacteroidia	o_Cytophagales	f_Cyclobacteriaceae
OTU_4459	Sediment	1.92235	0.226562	5	Peripherals	k_Bacteria	p_Bacteroidota	c_Bacteroidia	o_Flavobacteriales	f_Crocinitomicaceae
OTU_4461	Sediment	-0.150188	0.625	2	Connectors	k_Bacteria	p_Bacteroidota	c_Rhodothermia	o_Balneolales	f_Balneolaceae
OTU_4466	Sediment	0.311315	0	3	Peripherals	k_Bacteria	p_Bacteroidota	c_Bacteroidia	o_Sphingobacteriales	f_E6aC02
OTU_4468	Sediment	-0.0143459	0.277778	5	Peripherals	k_Bacteria	p_Bacteroidota	c_Rhodothermia	o_Balneolales	f_Balneolaceae
OTU_4478	Sediment	1.75	0	10	Peripherals	k_Bacteria	p_Bacteroidota	c_Bacteroidia	o_Sphingobacteriales	f_Lentimicrobiaceae
OTU_4479	Sediment	2.73846	0	4	Module hubs	k_Bacteria	p_Bacteroidota	c_Bacteroidia	o_Cytophagales	f_Cyclobacteriaceae
OTU_4481	Sediment	-0.357441	0	1	Peripherals	k_Bacteria	p_Spirochaetota	c_Spirochaetia	o_Spirochaetales	f_Spirochaetaceae
OTU_4484	Sediment	-0.975502	0	4	Peripherals	k_Bacteria	p_Bacteroidota	c_Bacteroidia	o_Flavobacteriales	f_Cryomorphaceae
OTU_4485	Sediment	-0.150188	0	2	Peripherals	k_Bacteria	p_Bacteroidota	c_Bacteroidia	o_Bacteroidales	f_Marinilabiliaceae
OTU_4486	Sediment	-0.975502	0	4	Peripherals	k_Bacteria	p_Bacteroidota	c_Bacteroidia	o_Bacteroidales	f_Prolixibacteraceae
OTU_4488	Sediment	0.343693	0.244898	1	Peripherals	k_Bacteria	p_Bacteroidota	c_Bacteroidia	o_Flavobacteriales	f_Cryomorphaceae
OTU_4489	Sediment	1.47796	0.117188	3	Peripherals	k_Bacteria	p_Bacteroidota	c_Bacteroidia	o_Bacteroidales	f_SB-5
OTU_4495	Sediment	0.109982	0	1	Peripherals	k_Bacteria	p_Bacteroidota	c_Rhodothermia	o_Balneolales	f_Balneolaceae
OTU_4496	Sediment	0.644641	0	3	Peripherals	k_Bacteria	p_Bacteroidota	c_Bacteroidia	o_Cytophagales	f_Cyclobacteriaceae
OTU_4502	Sediment	1.92235	0.604043	5	Peripherals	k_Bacteria	p_Bacteroidota	c_Rhodothermia	o_Balneolales	f_Balneolaceae
OTU_4508	Sediment	-0.688666	0	3	Peripherals	k_Bacteria	p_Bacteroidota	c_Bacteroidia	o_Flavobacteriales	f_Flavobacteriaceae
OTU_4509	Sediment	0.138686	0.21875	4	Peripherals	k_Bacteria	p_Bacteroidota	c_Bacteroidia	o_Bacteroidales	f_Marinilabiliaceae
OTU_4519	Sediment	-0.188676	0	3	Peripherals	k_Bacteria	p_Spirochaetota	c_Spirochaetia	o_Spirochaetales	f_Spirochaetaceae
OTU_4523	Sediment	-0.75	0	10	Peripherals	k_Bacteria	p_Bacteroidota	c_Bacteroidia	o_Bacteroidales	f_Marinilabiliaceae
OTU_4525	Sediment	-0.855329	0	3	Peripherals	k_Bacteria	p_Bacteroidota	c_Kapabacteria	o_Kapabacteriales	f_uncultured__organism
OTU_4526	Sediment	-1.00125	0.5	2	Peripherals	k_Bacteria	p_Bacteroidota	c_Bacteroidia	o_Bacteroidales	f_Bacteroidetes__BD2-2
OTU_4527	Sediment	0.700877	0.71875	2	Connectors	k_Bacteria	p_Bacteroidota	c_Bacteroidia	o_Flavobacteriales	f_Cryomorphaceae
OTU_4529	Sediment	-0.974483	0	6	Peripherals	k_Bacteria	p_Bacteroidota	c_Bacteroidia	o_Cytophagales	f_Cyclobacteriaceae
OTU_4530	Sediment	0.700877	0.375	2	Peripherals	k_Bacteria	p_Bacteroidota	c_Bacteroidia	o_Sphingobacteriales	f_Lentimicrobiaceae
OTU_4535	Sediment	-0.65991	0.444444	5	Peripherals	k_Bacteria	p_Spirochaetota	c_Spirochaetia	o_Spirochaetales	f_Spirochaetaceae
OTU_4538	Sediment	-0.544331	0	8	Peripherals	k_Bacteria	p_Bacteroidota	c_Bacteroidia	o_Bacteroidales	f_Prolixibacteraceae
OTU_4540	Sediment	-0.592333	0.64	6	Connectors	k_Bacteria	p_Bacteroidota	c_Bacteroidia	o_Bacteroidales	f_Salinivirgaceae
OTU_4544	Sediment	-0.355339	0	3	Peripherals	k_Bacteria	p_Spirochaetota	c_Spirochaetia	o_Spirochaetales	f_Spirochaetaceae
OTU_4548	Sediment	-0.604106	0	4	Peripherals	k_Bacteria	p_Bacteroidota	c_Bacteroidia	o_Sphingobacteriales	f_S15A-MN91
OTU_4551	Sediment	0.577405	0	1	Peripherals	k_Bacteria	p_Bacteroidota	c_Bacteroidia	o_Cytophagales	f_Cyclobacteriaceae
OTU_4555	Sediment	1.47796	0.277778	3	Peripherals	k_Bacteria	p_Bacteroidota	c_Bacteroidia	o_Bacteroidales	f_Marinilabiliaceae
OTU_4563	Sediment	0.577405	0.21875	1	Peripherals	k_Bacteria	p_Planctomycetota	c_vadinHA49	o_uncultured__organism	f_uncultured__bacterium
OTU_4573	Sediment	-0.591153	0	1	Peripherals	k_Bacteria	p_Proteobacteria	c_Alphaproteobacteria	o_Rickettsiales	f_AB1
OTU_4580	Sediment	-0.355339	0	3	Peripherals	k_Bacteria	p_Spirochaetota	c_Spirochaetia	o_Spirochaetales	f_Spirochaetaceae
OTU_4584	Sediment	-0.604106	0	4	Peripherals	k_Bacteria	p_Bacteroidota	c_Bacteroidia	o_Bacteroidales	f_Salinivirgaceae
OTU_4587	Sediment	0.554118	0.44898	6	Peripherals	k_Bacteria	p_Fusobacteriota	c_Fusobacteriia	o_Fusobacteriales	f_Leptotrichiaceae
OTU_4589	Sediment	0	0	17	Peripherals	k_Bacteria	p_Bacteroidota	c_Bacteroidia	o_Bacteroidales	f_Marinilabiliaceae
OTU_4590	Sediment	-0.150188	0	2	Peripherals	k_Bacteria	p_Spirochaetota	c_Spirochaetia	o_Spirochaetales	f_Spirochaetaceae
OTU_4598	Sediment	1.64462	0.110727	3	Peripherals	k_Bacteria	p_Bacteroidota	c_Bacteroidia	o_Bacteroidales	f_Marinilabiliaceae
OTU_4605	Sediment	0	0	14	Peripherals	k_Bacteria	p_Spirochaetota	c_Spirochaetia	o_Spirochaetales	f_Spirochaetaceae
OTU_4625	Sediment	-0.604106	0.375	4	Peripherals	k_Bacteria	p_Bacteroidota	c_Bacteroidia	o_Bacteroidales	f_Marinilabiliaceae
OTU_4634	Sediment	-0.591153	0	1	Peripherals	k_Bacteria	p_Bacteroidota	c_Bacteroidia	o_Flavobacteriales	f_Cryomorphaceae
OTU_4637	Sediment	-0.875097	0.666667	5	Connectors	k_Bacteria	p_Bacteroidota	c_Rhodothermia	o_Balneolales	f_Balneolaceae
OTU_4640	Sediment	-0.188676	0	3	Peripherals	k_Bacteria	p_Spirochaetota	c_Spirochaetia	o_Spirochaetales	f_Spirochaetaceae
OTU_4663	Sediment	-0.12373	0	1	Peripherals	k_Bacteria	p_Bacteroidota	c_Bacteroidia	o_Flavobacteriales	f_Cryomorphaceae
OTU_4721	Sediment	-0.855329	0	3	Peripherals	k_Bacteria	p_Bacteroidota	c_Bacteroidia	o_Bacteroidales	f_Prolixibacteraceae
OTU_4728	Sediment	0	0	19	Peripherals	k_Bacteria	p_Bacteroidota	c_Bacteroidia	o_Bacteroidales	f_Prolixibacteraceae
OTU_4739	Sediment	-0.522002	0	3	Peripherals	k_Bacteria	p_Bacteroidota	c_Bacteroidia	o_Sphingobacteriales	f_ST-12K33
OTU_4746	Sediment	-0.229534	0	5	Peripherals	k_Bacteria	p_Bacteroidota	c_Bacteroidia	o_Flavobacteriales	f_Crocinitomicaceae
OTU_4777	Sediment	-0.0143459	0	5	Peripherals	k_Bacteria	p_Bacteroidota	c_Rhodothermia	o_Balneolales	f_Balneolaceae
OTU_4780	Sediment	-0.57735	0	13	Peripherals	k_Bacteria	p_Bacteroidota	c_Bacteroidia	o_Cytophagales	f_Flammeovirgaceae
OTU_4783	Sediment	-0.150188	0	2	Peripherals	k_Bacteria	p_Desulfobacterota	c_Desulfobulbia	o_Desulfobulbales	f_Desulfobulbaceae
OTU_4799	Sediment	-0.688666	0	3	Peripherals	k_Bacteria	p_Bacteroidota	c_Bacteroidia	o_Bacteroidales	f_Marinilabiliaceae
OTU_4824	Sediment	-0.789804	0	4	Peripherals	k_Bacteria	p_Spirochaetota	c_Spirochaetia	o_Spirochaetales	f_Spirochaetaceae
OTU_4851	Sediment	0.846406	0.31405	5	Peripherals	k_Bacteria	p_Bacteroidota	c_Rhodothermia	o_Balneolales	f_Balneolaceae
OTU_4895	Sediment	-0.355339	0.5	3	Peripherals	k_Bacteria	p_Bacteroidota	c_Bacteroidia	o_Bacteroidales	f_Bacteroidetes__BD2-2
OTU_4953	Sediment	-0.0470121	0.444444	4	Peripherals	k_Bacteria	p_Deinococcota	c_Deinococci	o_Deinococcales	f_Trueperaceae
OTU_4960	Sediment	-0.447214	0	11	Peripherals	k_Bacteria	p_Verrucomicrobiota	c_Omnitrophia	o_Omnitrophales	f_Omnitrophaceae
OTU_4983	Sediment	0	0	15	Peripherals	k_Bacteria	p_Deinococcota	c_Deinococci	o_Deinococcales	f_Trueperaceae
OTU_4986	Sediment	-0.0143459	0.277778	5	Peripherals	k_Bacteria	p_Proteobacteria	c_Gammaproteobacteria	o_Ectothiorhodospirales	f_Ectothiorhodospiraceae
OTU_4987	Sediment	-0.591153	0.625	1	Connectors	k_Bacteria	p_Proteobacteria	c_Alphaproteobacteria	o_Thalassobaculales	f_uncultured
OTU_5044	Sediment	-0.688666	0	3	Peripherals	k_Bacteria	p_Bacteroidota	c_Bacteroidia	o_Bacteroidales	f_SB-5
OTU_5060	Sediment	-0.229534	0	5	Peripherals	k_Bacteria	p_Deinococcota	c_Deinococci	o_Deinococcales	f_Trueperaceae
OTU_5101	Sediment	0.109982	0	1	Peripherals	k_Bacteria	p_Bacteroidota	c_Bacteroidia	o_Flavobacteriales	f_Cryomorphaceae
OTU_516	Sediment	-1.02454	0	7	Peripherals	k_Bacteria	p_Actinobacteriota	c_Acidimicrobiia	o_Actinomarinales	f_uncultured
OTU_5175	Sediment	-0.12373	0	1	Peripherals	k_Bacteria	p_Bacteroidota	c_Bacteroidia	o_Chitinophagales	f_Saprospiraceae
OTU_5179	Sediment	-0.23271	0	4	Peripherals	k_Bacteria	p_Bacteroidota	c_Bacteroidia	o_Chitinophagales	f_Saprospiraceae
OTU_5185	Sediment	-0.975502	0	4	Peripherals	k_Bacteria	p_Firmicutes	c_Clostridia	o_Peptostreptococcales-Tissierellales	f_Alkaliphilus
OTU_5187	Sediment	-0.357441	0	1	Peripherals	k_Bacteria	p_Bacteroidota	c_Bacteroidia	o_Chitinophagales	f_Saprospiraceae
OTU_5201	Sediment	-0.57735	0	13	Peripherals	k_Bacteria	p_Firmicutes	c_Clostridia	o_Peptostreptococcales-Tissierellales	f_Dethiosulfatibacteraceae
OTU_5210	Sediment	-0.447214	0	11	Peripherals	k_Bacteria	p_Calditrichota	c_Calditrichia	o_Calditrichales	f_Calditrichaceae
OTU_5212	Sediment	-0.357441	0	1	Peripherals	k_Bacteria	p_Bacteroidota	c_Kapabacteria	o_Kapabacteriales	f_uncultured__bacterium
OTU_5213	Sediment	3.10985	0.263374	4	Module hubs	k_Bacteria	p_Bacteroidota	c_Bacteroidia	o_Chitinophagales	f_Saprospiraceae
OTU_5221	Sediment	-0.0220121	0	3	Peripherals	k_Bacteria	p_Bacteroidota	c_Kryptonia	o_Kryptoniales	f_MSB-3C8
OTU_5244	Sediment	0.343693	0	1	Peripherals	k_Bacteria	p_Bacteroidota	c_Bacteroidia	o_Chitinophagales	f_Saprospiraceae
OTU_5276	Sediment	0.144651	0	3	Peripherals	k_Bacteria	p_Bacteroidota	c_Bacteroidia	o_Chitinophagales	f_Saprospiraceae
OTU_5329	Sediment	-0.604106	0	4	Peripherals	k_Bacteria	p_Bacteroidota	c_Bacteroidia	o_Flavobacteriales	f_NS9__marine__group
OTU_5348	Sediment	-0.789804	0.444444	4	Peripherals	k_Bacteria	p_Proteobacteria	c_Alphaproteobacteria	o_Rickettsiales	f_Mitochondria
OTU_5397	Sediment	-0.975502	0	4	Peripherals	k_Bacteria	p_Bacteroidota	c_Bacteroidia	o_Chitinophagales	f_uncultured
OTU_5403	Sediment	-0.824864	0.5	1	Peripherals	k_Bacteria	p_Bacteroidota	c_Bacteroidia	o_Cytophagales	f_Flammeovirgaceae
OTU_5407	Sediment	3.22917	0.346667	6	Module hubs	k_Bacteria	p_Bacteroidota	c_Bacteroidia	o_Chitinophagales	f_Saprospiraceae
OTU_5408	Sediment	-0.357441	0	1	Peripherals	k_Bacteria	p_Bacteroidota	c_Bacteroidia	o_Chitinophagales	f_Saprospiraceae
OTU_553	Sediment	-0.522002	0.56	3	Peripherals	k_Bacteria	p_Bacteroidota	c_Bacteroidia	o_Flavobacteriales	f_Flavobacteriaceae
OTU_568	Sediment	3.42866	0.0867769	5	Module hubs	k_Bacteria	p_Proteobacteria	c_Gammaproteobacteria	o_Gammaproteobacteria__Incertae__Sedis	f_Unknown__Family
OTU_587	Sediment	-0.65991	0	5	Peripherals	k_Bacteria	p_Actinobacteriota	c_Acidimicrobiia	o_Microtrichales	f_Ilumatobacteraceae
OTU_594	Sediment	0.343693	0	1	Peripherals	k_Bacteria	p_Bacteroidota	c_Bacteroidia	o_Flavobacteriales	f_Flavobacteriaceae
OTU_599	Sediment	-0.824864	0	1	Peripherals	k_Bacteria	p_Gemmatimonadota	c_PAUC43f__marine__benthic__group	o_uncultured__bacterium	f_uncultured__bacterium
OTU_602	Sediment	1.51225	0.417778	1	Peripherals	k_Bacteria	p_Bacteroidota	c_Bacteroidia	o_Flavobacteriales	f_Flavobacteriaceae
OTU_607	Sediment	0.881477	0	4	Peripherals	k_Bacteria	p_Actinobacteriota	c_Acidimicrobiia	o_Microtrichales	f_Ilumatobacteraceae
OTU_611	Sediment	-0.824864	0	1	Peripherals	k_Bacteria	p_Actinobacteriota	c_Acidimicrobiia	o_Microtrichales	f_Microtrichaceae
OTU_629	Sediment	-1.02454	0	7	Peripherals	k_Bacteria	p_Verrucomicrobiota	c_Lentisphaeria	o_Oligosphaerales	f_Lenti-02
OTU_632	Sediment	0.554118	0.277778	6	Peripherals	k_Bacteria	p_Actinobacteriota	c_Acidimicrobiia	o_Microtrichales	f_Ilumatobacteraceae
OTU_636	Sediment	-0.444722	0	5	Peripherals	k_Bacteria	p_Proteobacteria	c_Gammaproteobacteria	o_Gammaproteobacteria__Incertae__Sedis	f_Unknown__Family
OTU_646	Sediment	0.324384	0.641975	4	Connectors	k_Bacteria	p_Proteobacteria	c_Gammaproteobacteria	o_Gammaproteobacteria__Incertae__Sedis	f_Unknown__Family
OTU_664	Sediment	-0.418408	0.59375	4	Peripherals	k_Bacteria	p_Desulfobacterota	c_Desulfobulbia	o_Desulfobulbales	f_Desulfobulbaceae
OTU_690	Sediment	-0.789804	0.72	4	Connectors	k_Bacteria	p_Proteobacteria	c_Gammaproteobacteria	o_Gammaproteobacteria__Incertae__Sedis	f_Unknown__Family
OTU_691	Sediment	0.5	0	10	Peripherals	k_Bacteria	p_Bacteroidota	c_Bacteroidia	o_Bacteroidales	f_Prolixibacteraceae
OTU_692	Sediment	-0.591153	0	1	Peripherals	k_Bacteria	p_Proteobacteria	c_Gammaproteobacteria	o_Gammaproteobacteria__Incertae__Sedis	f_Unknown__Family
OTU_694	Sediment	-0.975502	0	4	Peripherals	k_Bacteria	p_Proteobacteria	c_Gammaproteobacteria	o_Gammaproteobacteria__Incertae__Sedis	f_Unknown__Family
OTU_695	Sediment	-0.875097	0	5	Peripherals	k_Bacteria	p_Proteobacteria	c_Gammaproteobacteria	o_Ectothiorhodospirales	f_Ectothiorhodospiraceae
OTU_699	Sediment	-0.975502	0	4	Peripherals	k_Bacteria	p_Proteobacteria	c_Gammaproteobacteria	o_Nitrosococcales	f_Nitrosococcaceae
OTU_702	Sediment	-0.604106	0	4	Peripherals	k_Bacteria	p_Proteobacteria	c_Gammaproteobacteria	o_Gammaproteobacteria__Incertae__Sedis	f_Unknown__Family
OTU_703	Sediment	-0.592333	0.625	6	Connectors	k_Bacteria	p_Proteobacteria	c_Gammaproteobacteria	o_Gammaproteobacteria__Incertae__Sedis	f_Unknown__Family
OTU_704	Sediment	-0.210183	0.48	6	Peripherals	k_Bacteria	p_Proteobacteria	c_Gammaproteobacteria	o_Gammaproteobacteria__Incertae__Sedis	f_Unknown__Family
OTU_713	Sediment	0.881477	0.676749	4	Connectors	k_Bacteria	p_Actinobacteriota	c_Acidimicrobiia	o_Microtrichales	f_uncultured
OTU_719	Sediment	-0.789804	0	4	Peripherals	k_Bacteria	p_Proteobacteria	c_Gammaproteobacteria	o_Gammaproteobacteria__Incertae__Sedis	f_Unknown__Family
OTU_750	Sediment	0.324384	0.34	4	Peripherals	k_Bacteria	p_Actinobacteriota	c_Actinobacteria	o_Nitriliruptorales	f_Nitriliruptoraceae
OTU_751	Sediment	-0.774597	0	9	Peripherals	k_Bacteria	p_Gemmatimonadota	c_PAUC43f__marine__benthic__group	o_uncultured__bacterium	f_uncultured__bacterium
OTU_752	Sediment	3.38194	0.508918	1	Module hubs	k_Bacteria	p_Bacteroidota	c_Bacteroidia	o_Flavobacteriales	f_Flavobacteriaceae
OTU_754	Sediment	-0.855329	0	3	Peripherals	k_Bacteria	p_Proteobacteria	c_Gammaproteobacteria	o_Ectothiorhodospirales	f_Ectothiorhodospiraceae
OTU_755	Sediment	1.27854	0.165289	1	Peripherals	k_Bacteria	p_Actinobacteriota	c_Actinobacteria	o_Nitriliruptorales	f_Nitriliruptoraceae
OTU_761	Sediment	1.73205	0	13	Peripherals	k_Bacteria	p_Proteobacteria	c_Gammaproteobacteria	o_Thioprofundaceae	f_Thioprofundum
OTU_770	Sediment	-1.02454	0	7	Peripherals	k_Bacteria	p_Actinobacteriota	c_Actinobacteria	o_Nitriliruptorales	f_Nitriliruptoraceae
OTU_771	Sediment	-1.00125	0	2	Peripherals	k_Bacteria	p_Gemmatimonadota	c_PAUC43f__marine__benthic__group	o_uncultured__bacterium	f_uncultured__bacterium
OTU_790	Sediment	0.138686	0.21875	4	Peripherals	k_Bacteria	p_Gemmatimonadota	c_BD2-11__terrestrial__group	o_uncultured__bacterium	f_uncultured__bacterium
OTU_795	Sediment	-0.824864	0	1	Peripherals	k_Bacteria	p_Actinobacteriota	c_Coriobacteriia	o_OPB41	f_uncultured__bacterium
OTU_797	Sediment	0	0	18	Peripherals	k_Bacteria	p_Planctomycetota	c_Phycisphaerae	o_Phycisphaerales	f_Phycisphaeraceae
OTU_801	Sediment	-0.0143459	0.53125	5	Peripherals	k_Bacteria	p_Proteobacteria	c_Gammaproteobacteria	o_Gammaproteobacteria__Incertae__Sedis	f_Unknown__Family
OTU_804	Sediment	0.136083	0	8	Peripherals	k_Bacteria	p_Spirochaetota	c_Spirochaetia	o_Spirochaetales	f_Spirochaetaceae
OTU_808	Sediment	1.55194	0	2	Peripherals	k_Bacteria	p_Proteobacteria	c_Gammaproteobacteria	o_Granulosicoccales	f_Methylohalomonas
OTU_816	Sediment	-0.824864	0	1	Peripherals	k_Bacteria	p_Planctomycetota	c_OM190	o_uncultured__bacterium	f_uncultured__bacterium
OTU_819	Sediment	-0.447214	0	11	Peripherals	k_Bacteria	p_Chloroflexi	c_Anaerolineae	o_Ardenticatenales	f_uncultured
OTU_832	Sediment	-0.65991	0	5	Peripherals	k_Bacteria	p_Bacteroidota	c_Bacteroidia	o_Flavobacteriales	f_Flavobacteriaceae
OTU_834	Sediment	0.881477	0	4	Peripherals	k_Bacteria	p_Proteobacteria	c_Gammaproteobacteria	o_Gammaproteobacteria__Incertae__Sedis	f_Unknown__Family
OTU_84	Sediment	2.23607	0.617284	11	Peripherals	k_Archaea	p_Halobacterota	c_Halobacteria	o_Halobacterales	f_Haloferacaceae
OTU_86	Sediment	-0.591153	0.444444	1	Peripherals	k_Archaea	p_Halobacterota	c_Halobacteria	o_Halobacterales	f_Haloferacaceae
OTU_866	Sediment	1.25287	0.231111	4	Peripherals	k_Bacteria	p_Proteobacteria	c_Gammaproteobacteria	o_Gammaproteobacteria__Incertae__Sedis	f_Unknown__Family
OTU_91	Sediment	-0.355339	0.5	3	Peripherals	k_Archaea	p_Halobacterota	c_Halobacteria	o_Halobacterales	f_Haloferacaceae
OTU_95	Sediment	0.138686	0.611111	4	Peripherals	k_Archaea	p_Halobacterota	c_Halobacteria	o_Halobacterales	f_Halomicrobiaceae
OTU_952	Sediment	0.695779	0.165289	4	Peripherals	k_Bacteria	p_Proteobacteria	c_Gammaproteobacteria	o_Steroidobacterales	f_Woeseiaceae
OTU_958	Sediment	-0.444722	0	5	Peripherals	k_Bacteria	p_Proteobacteria	c_Gammaproteobacteria	o_Ectothiorhodospirales	f_Ectothiorhodospiraceae
OTU_1059	Water	0.319696	0	2	Peripherals	k_Bacteria	p_Actinobacteriota	c_Actinobacteria	o_Micrococcales	f_Microbacteriaceae
OTU_1067	Water	0.97016	0	1	Peripherals	k_Bacteria	p_Actinobacteriota	c_Actinobacteria	o_Micrococcales	f_Microbacteriaceae
OTU_1079	Water	-1.07534	0	2	Peripherals	k_Bacteria	p_Bacteroidota	c_Bacteroidia	o_Flavobacteriales	f_Flavobacteriaceae
OTU_1081	Water	-0.592984	0	1	Peripherals	k_Bacteria	p_Proteobacteria	c_Alphaproteobacteria	o_Rhodobacterales	f_Rhodobacteraceae
OTU_1086	Water	1.23068	0.0867769	1	Peripherals	k_Bacteria	p_Proteobacteria	c_Gammaproteobacteria	o_Nitrococcales	f_Nitrococcaceae
OTU_1097	Water	1.40472	0.297521	2	Peripherals	k_Bacteria	p_Bacteroidota	c_Bacteroidia	o_Flavobacteriales	f_Flavobacteriaceae
OTU_1099	Water	-0.610329	0	2	Peripherals	k_Bacteria	p_Verrucomicrobiota	c_Verrucomicrobiae	o_Opitutales	f_Puniceicoccaceae
OTU_1106	Water	0.00968776	0.459184	2	Peripherals	k_Bacteria	p_Proteobacteria	c_Gammaproteobacteria	o_Nitrococcales	f_Nitrococcaceae
OTU_1115	Water	-0.723246	0.244898	1	Peripherals	k_Bacteria	p_Bacteroidota	c_Bacteroidia	o_Flavobacteriales	f_Flavobacteriaceae
OTU_1133	Water	-1.07534	0	2	Peripherals	k_Bacteria	p_Bacteroidota	c_Bacteroidia	o_Flavobacteriales	f_Flavobacteriaceae
OTU_1149	Water	-1.37456	0	1	Peripherals	k_Bacteria	p_Proteobacteria	c_Gammaproteobacteria	o_Nitrosococcales	f_Methylophagaceae
OTU_1178	Water	-0.428026	0	3	Peripherals	k_Bacteria	p_Bacteroidota	c_Bacteroidia	o_Flavobacteriales	f_Flavobacteriaceae
OTU_1253	Water	1.24972	0	2	Peripherals	k_Bacteria	p_Bacteroidota	c_Bacteroidia	o_Flavobacteriales	f_Flavobacteriaceae
OTU_1361	Water	0.164692	0	2	Peripherals	k_Bacteria	p_Bacteroidota	c_Bacteroidia	o_Flavobacteriales	f_Flavobacteriaceae
OTU_1385	Water	1.71473	0.0907029	2	Peripherals	k_Bacteria	p_Bacteroidota	c_Bacteroidia	o_Flavobacteriales	f_Flavobacteriaceae
OTU_1513	Water	-0.30032	0.5	2	Peripherals	k_Bacteria	p_Proteobacteria	c_Gammaproteobacteria	o_Gammaproteobacteria__Incertae__Sedis	f_Unknown__Family
OTU_1644	Water	1.10042	0	1	Peripherals	k_Bacteria	p_Bacteroidota	c_Bacteroidia	o_Flavobacteriales	f_Flavobacteriaceae
OTU_1871	Water	1.09472	0.203704	2	Peripherals	k_Bacteria	p_Firmicutes	c_Bacilli	o_Izemoplasmatales	f_Izemoplasmataceae
OTU_1877	Water	-0.853508	0	1	Peripherals	k_Bacteria	p_Bacteroidota	c_Bacteroidia	o_Flavobacteriales	f_Flavobacteriaceae
OTU_1878	Water	0.319696	0	2	Peripherals	k_Bacteria	p_Bacteroidota	c_Bacteroidia	o_Flavobacteriales	f_Flavobacteriaceae
OTU_1896	Water	-0.765333	0	2	Peripherals	k_Bacteria	p_Bacteroidota	c_Bacteroidia	o_Flavobacteriales	f_Flavobacteriaceae
OTU_2015	Water	-0.610329	0	2	Peripherals	k_Bacteria	p_Bacteroidota	c_Bacteroidia	o_Flavobacteriales	f_Flavobacteriaceae
OTU_2016	Water	0.319696	0	2	Peripherals	k_Bacteria	p_Proteobacteria	c_Gammaproteobacteria	o_Nitrococcales	f_Nitrococcaceae
OTU_2237	Water	0.31885	0	1	Peripherals	k_Bacteria	p_Proteobacteria	c_Gammaproteobacteria	o_Nitrococcales	f_Nitrococcaceae
OTU_2298	Water	0.164692	0	2	Peripherals	k_Bacteria	p_Proteobacteria	c_Gammaproteobacteria	o_Alteromonadales	f_Marinobacteraceae
OTU_246	Water	1.10042	0	1	Peripherals	k_Bacteria	p_Bacteroidota	c_Bacteroidia	o_Flavobacteriales	f_Flavobacteriaceae
OTU_2783	Water	-0.765333	0	2	Peripherals	k_Bacteria	p_Bacteroidota	c_Bacteroidia	o_Flavobacteriales	f_Flavobacteriaceae
OTU_2787	Water	-0.784714	0	3	Peripherals	k_Bacteria	p_Proteobacteria	c_Gammaproteobacteria	o_Oceanospirillales	f_Litoricolaceae
OTU_2790	Water	-0.0719357	0.391111	1	Peripherals	k_Bacteria	p_Proteobacteria	c_Gammaproteobacteria	o_Nitrococcales	f_Nitrococcaceae
OTU_2792	Water	0.0583263	0.142012	1	Peripherals	k_Bacteria	p_Bacteroidota	c_Bacteroidia	o_Flavobacteriales	f_Flavobacteriaceae
OTU_2821	Water	0.709636	0.255	1	Peripherals	k_Bacteria	p_Proteobacteria	c_Gammaproteobacteria	o_Oceanospirillales	f_Litoricolaceae
OTU_2826	Water	-0.30032	0.21875	2	Peripherals	k_Bacteria	p_Proteobacteria	c_Gammaproteobacteria	o_Cellvibrionales	f_Halieaceae
OTU_2830	Water	-1.23035	0	2	Peripherals	k_Bacteria	p_Proteobacteria	c_Gammaproteobacteria	o_Oceanospirillales	f_Halomonadaceae
OTU_2832	Water	2.5333	0.0605469	1	Module hubs	k_Bacteria	p_Proteobacteria	c_Gammaproteobacteria	o_Nitrococcales	f_Nitrococcaceae
OTU_2841	Water	1.75173	0	1	Peripherals	k_Bacteria	p_Proteobacteria	c_Gammaproteobacteria	o_Oceanospirillales	f_Pseudohongiellaceae
OTU_2845	Water	0.579374	0	1	Peripherals	k_Bacteria	p_Proteobacteria	c_Gammaproteobacteria	o_Cellvibrionales	f_Halieaceae
OTU_2847	Water	-0.455325	0	2	Peripherals	k_Bacteria	p_Proteobacteria	c_Gammaproteobacteria	o_Vibrionales	f_Vibrionaceae
OTU_2853	Water	-0.455325	0	2	Peripherals	k_Bacteria	p_Proteobacteria	c_Gammaproteobacteria	o_Nitrococcales	f_Nitrococcaceae
OTU_2892	Water	0.188588	0	1	Peripherals	k_Bacteria	p_Proteobacteria	c_Gammaproteobacteria	o_Vibrionales	f_Vibrionaceae
OTU_2903	Water	0.4747	0	2	Peripherals	k_Bacteria	p_Proteobacteria	c_Gammaproteobacteria	o_Nitrococcales	f_Nitrococcaceae
OTU_2908	Water	-0.610329	0	2	Peripherals	k_Bacteria	p_Proteobacteria	c_Gammaproteobacteria	o_Nitrococcales	f_Nitrococcaceae
OTU_2919	Water	1.10042	0	1	Peripherals	k_Bacteria	p_Proteobacteria	c_Gammaproteobacteria	o_Nitrococcales	f_Nitrococcaceae
OTU_2933	Water	-1.23035	0	2	Peripherals	k_Bacteria	p_Proteobacteria	c_Gammaproteobacteria	o_Gammaproteobacteria__Incertae__Sedis	f_Unknown__Family
OTU_2937	Water	1.40472	0.185	2	Peripherals	k_Bacteria	p_Firmicutes	c_Bacilli	o_Izemoplasmatales	f_Izemoplasmataceae
OTU_2940	Water	-0.0719357	0	1	Peripherals	k_Bacteria	p_Verrucomicrobiota	c_Kiritimatiellae	o_Kiritimatiellales	f_Kiritimatiellaceae
OTU_2944	Water	-1.24429	0	1	Peripherals	k_Bacteria	p_Proteobacteria	c_Gammaproteobacteria	o_Nitrococcales	f_Nitrococcaceae
OTU_2946	Water	-0.853508	0	1	Peripherals	k_Bacteria	p_Proteobacteria	c_Gammaproteobacteria	o_Oceanospirillales	f_Halomonadaceae
OTU_2981	Water	-0.765333	0	2	Peripherals	k_Bacteria	p_Proteobacteria	c_Gammaproteobacteria	o_Oceanospirillales	f_Litoricolaceae
OTU_3026	Water	-1.11403	0	1	Peripherals	k_Bacteria	p_Proteobacteria	c_Gammaproteobacteria	o_Oceanospirillales	f_Litoricolaceae
OTU_3027	Water	-0.765333	0	2	Peripherals	k_Bacteria	p_Proteobacteria	c_Gammaproteobacteria	o_Burkholderiales	f_Alcaligenaceae
OTU_3055	Water	-1.37456	0	1	Peripherals	k_Bacteria	p_Proteobacteria	c_Gammaproteobacteria	o_Oceanospirillales	f_Halomonadaceae
OTU_3057	Water	-0.428026	0.5	3	Peripherals	k_Bacteria	p_Proteobacteria	c_Gammaproteobacteria	o_Cellvibrionales	f_Halieaceae
OTU_3088	Water	-1.23035	0	2	Peripherals	k_Bacteria	p_Proteobacteria	c_Gammaproteobacteria	o_Cellvibrionales	f_Halieaceae
OTU_3090	Water	0.579374	0.197531	1	Peripherals	k_Bacteria	p_Proteobacteria	c_Gammaproteobacteria	o_Nitrococcales	f_Nitrococcaceae
OTU_3107	Water	-0.33246	0.426036	1	Peripherals	k_Bacteria	p_Proteobacteria	c_Alphaproteobacteria	o_Rhodobacterales	f_Rhodobacteraceae
OTU_3131	Water	-0.202198	0	1	Peripherals	k_Bacteria	p_Proteobacteria	c_Gammaproteobacteria	o_Cellvibrionales	f_Halieaceae
OTU_3189	Water	0.579374	0	1	Peripherals	k_Bacteria	p_Proteobacteria	c_Gammaproteobacteria	o_Nitrococcales	f_Nitrococcaceae
OTU_3190	Water	0.164692	0	2	Peripherals	k_Bacteria	p_Firmicutes	c_Bacilli	o_Izemoplasmatales	f_Izemoplasmataceae
OTU_3199	Water	0.709636	0	1	Peripherals	k_Bacteria	p_Bacteroidota	c_Bacteroidia	o_Flavobacteriales	f_Flavobacteriaceae
OTU_3275	Water	0.164692	0	2	Peripherals	k_Bacteria	p_Proteobacteria	c_Gammaproteobacteria	o_Nitrococcales	f_Nitrococcaceae
OTU_3278	Water	0.0583263	0	1	Peripherals	k_Bacteria	p_Bacteroidota	c_Bacteroidia	o_Flavobacteriales	f_Flavobacteriaceae
OTU_3283	Water	-1.37456	0	1	Peripherals	k_Bacteria	p_Proteobacteria	c_Gammaproteobacteria	o_Oceanospirillales	f_Litoricolaceae
OTU_3291	Water	-0.455325	0	2	Peripherals	k_Bacteria	p_Proteobacteria	c_Gammaproteobacteria	o_Gammaproteobacteria__Incertae__Sedis	f_Unknown__Family
OTU_3292	Water	0.285351	0.444444	3	Peripherals	k_Bacteria	p_Proteobacteria	c_Alphaproteobacteria	o_Rhodobacterales	f_Rhodobacteraceae
OTU_3294	Water	-0.784714	0	3	Peripherals	k_Bacteria	p_Proteobacteria	c_Gammaproteobacteria	o_Burkholderiales	f_Alcaligenaceae
OTU_3301	Water	-1.24429	0	1	Peripherals	k_Bacteria	p_Proteobacteria	c_Alphaproteobacteria	o_Sphingomonadales	f_Sphingomonadaceae
OTU_3501	Water	1.09472	0	2	Peripherals	k_Bacteria	p_Proteobacteria	c_Gammaproteobacteria	o_Cellvibrionales	f_Halieaceae
OTU_3502	Water	-0.920337	0.48	2	Peripherals	k_Bacteria	p_Proteobacteria	c_Gammaproteobacteria	o_Nitrococcales	f_Nitrococcaceae
OTU_3507	Water	-0.428026	0	3	Peripherals	k_Bacteria	p_Actinobacteriota	c_Actinobacteria	o_Micrococcales	f_Microbacteriaceae
OTU_3511	Water	-0.983769	0	1	Peripherals	k_Bacteria	p_Proteobacteria	c_Gammaproteobacteria	o_Nitrococcales	f_Nitrococcaceae
OTU_3514	Water	1.75173	0.0739645	1	Peripherals	k_Bacteria	p_Proteobacteria	c_Gammaproteobacteria	o_Nitrococcales	f_Nitrococcaceae
OTU_3537	Water	-0.592984	0	1	Peripherals	k_Bacteria	p_Proteobacteria	c_Alphaproteobacteria	o_Rhodobacterales	f_Rhodobacteraceae
OTU_3550	Water	-0.983769	0	1	Peripherals	k_Bacteria	p_Proteobacteria	c_Gammaproteobacteria	o_Cellvibrionales	f_Halieaceae
OTU_3562	Water	2.42548	0.438776	3	Peripherals	k_Bacteria	p_Proteobacteria	c_Alphaproteobacteria	o_Rhodobacterales	f_Rhodobacteraceae
OTU_3563	Water	0.998727	0.244898	3	Peripherals	k_Bacteria	p_Proteobacteria	c_Gammaproteobacteria	o_Burkholderiales	f_Alcaligenaceae
OTU_3564	Water	1.88199	0	1	Peripherals	k_Bacteria	p_Proteobacteria	c_Alphaproteobacteria	o_Rhodobacterales	f_Rhodobacteraceae
OTU_3566	Water	1.10042	0	1	Peripherals	k_Bacteria	p_Proteobacteria	c_Alphaproteobacteria	o_Rhodobacterales	f_Rhodobacteraceae
OTU_3568	Water	-0.0713376	0.653061	3	Connectors	k_Bacteria	p_Proteobacteria	c_Alphaproteobacteria	o_Rhodobacterales	f_Rhodobacteraceae
OTU_3570	Water	-0.723246	0	1	Peripherals	k_Bacteria	p_Proteobacteria	c_Alphaproteobacteria	o_Rhodobacterales	f_Rhodobacteraceae
OTU_3580	Water	-0.462722	0	1	Peripherals	k_Bacteria	p_Proteobacteria	c_Alphaproteobacteria	o_Rhodobacterales	f_Rhodobacteraceae
OTU_3584	Water	-1.11403	0.375	1	Peripherals	k_Bacteria	p_Proteobacteria	c_Alphaproteobacteria	o_Rhodobacterales	f_Rhodobacteraceae
OTU_3589	Water	-0.784714	0.5	3	Peripherals	k_Bacteria	p_Proteobacteria	c_Alphaproteobacteria	o_Rhodobacterales	f_Rhodobacteraceae
OTU_3598	Water	1.24972	0	2	Peripherals	k_Bacteria	p_Proteobacteria	c_Alphaproteobacteria	o_Rhodobacterales	f_Rhodobacteraceae
OTU_3600	Water	-0.784714	0.5	3	Peripherals	k_Bacteria	p_Proteobacteria	c_Alphaproteobacteria	o_Rhodobacterales	f_Rhodobacteraceae
OTU_3605	Water	-0.455325	0	2	Peripherals	k_Bacteria	p_Proteobacteria	c_Alphaproteobacteria	o_Rhodobacterales	f_Rhodobacteraceae
OTU_3610	Water	-1.37456	0	1	Peripherals	k_Bacteria	p_Bacteroidota	c_Rhodothermia	o_Balneolales	f_Balneolaceae
OTU_3615	Water	-1.23035	0	2	Peripherals	k_Bacteria	p_Proteobacteria	c_Alphaproteobacteria	o_Caulobacterales	f_Hyphomonadaceae
OTU_3699	Water	-1.11403	0.375	1	Peripherals	k_Bacteria	p_Proteobacteria	c_Gammaproteobacteria	o_Nitrococcales	f_Nitrococcaceae
OTU_3737	Water	-1.11403	0	1	Peripherals	k_Bacteria	p_Proteobacteria	c_Gammaproteobacteria	o_Oceanospirillales	f_Litoricolaceae
OTU_3813	Water	-0.920337	0	2	Peripherals	k_Bacteria	p_Proteobacteria	c_Gammaproteobacteria	o_Gammaproteobacteria__Incertae__Sedis	f_Unknown__Family
OTU_3825	Water	-1.11403	0	1	Peripherals	k_Bacteria	p_Proteobacteria	c_Alphaproteobacteria	o_Rhodobacterales	f_Rhodobacteraceae
OTU_3929	Water	-1.23035	0	2	Peripherals	k_Bacteria	p_Proteobacteria	c_Alphaproteobacteria	o_Rhodobacterales	f_Rhodobacteraceae
OTU_3966	Water	-0.853508	0	1	Peripherals	k_Bacteria	p_Proteobacteria	c_Alphaproteobacteria	o_Rhodobacterales	f_Rhodobacteraceae
OTU_3971	Water	-0.983769	0	1	Peripherals	k_Bacteria	p_Proteobacteria	c_Alphaproteobacteria	o_Rhodobacterales	f_Rhodobacteraceae
OTU_4075	Water	-0.428026	0.444444	3	Peripherals	k_Bacteria	p_Proteobacteria	c_Alphaproteobacteria	o_Rhodobacterales	f_Rhodobacteraceae
OTU_4100	Water	-0.428026	0	3	Peripherals	k_Bacteria	p_Proteobacteria	c_Alphaproteobacteria	o_Rhodobacterales	f_Rhodobacteraceae
OTU_4137	Water	0.00968776	0	2	Peripherals	k_Bacteria	p_Proteobacteria	c_Alphaproteobacteria	o_Rhodobacterales	f_Rhodobacteraceae
OTU_4246	Water	1.49121	0.260631	1	Peripherals	k_Bacteria	p_Bacteroidota	c_Bacteroidia	o_Flavobacteriales	f_Cryomorphaceae
OTU_4394	Water	0.164692	0	2	Peripherals	k_Bacteria	p_Bacteroidota	c_Bacteroidia	o_ML602M-17	f_uncultured__bacterium
OTU_4412	Water	0.709636	0	1	Peripherals	k_Bacteria	p_Proteobacteria	c_Alphaproteobacteria	o_SAR11__clade	f_Clade__I
OTU_4415	Water	0.164692	0	2	Peripherals	k_Bacteria	p_Bacteroidota	c_Rhodothermia	o_Balneolales	f_Balneolaceae
OTU_4421	Water	-1.11403	0.375	1	Peripherals	k_Bacteria	p_Bacteroidota	c_Bacteroidia	o_Flavobacteriales	f_Cryomorphaceae
OTU_4442	Water	0.839898	0	1	Peripherals	k_Bacteria	p_Bacteroidota	c_Bacteroidia	o_Flavobacteriales	f_Cryomorphaceae
OTU_4449	Water	1.09472	0	2	Peripherals	k_Bacteria	p_Deinococcota	c_Deinococci	o_Deinococcales	f_Trueperaceae
OTU_467	Water	1.36095	0.0831758	1	Peripherals	k_Bacteria	p_Bacteroidota	c_Bacteroidia	o_Flavobacteriales	f_Flavobacteriaceae
OTU_507	Water	0.0583263	0.142012	1	Peripherals	k_Bacteria	p_Bacteroidota	c_Bacteroidia	o_Flavobacteriales	f_Flavobacteriaceae
OTU_511	Water	0.0583263	0.142012	1	Peripherals	k_Bacteria	p_Bacteroidota	c_Bacteroidia	o_Flavobacteriales	f_Flavobacteriaceae
OTU_519	Water	-1.24429	0.444444	1	Peripherals	k_Bacteria	p_Bacteroidota	c_Bacteroidia	o_Flavobacteriales	f_Flavobacteriaceae
OTU_5274	Water	0.31885	0.124444	1	Peripherals	k_Bacteria	p_Bacteroidota	c_Bacteroidia	o_Flavobacteriales	f_Flavobacteriaceae
OTU_5275	Water	0.642039	0.46875	3	Peripherals	k_Bacteria	p_Bacteroidota	c_Rhodothermia	o_Balneolales	f_Balneolaceae
OTU_5334	Water	2.48975	0.0739645	2	Peripherals	k_Bacteria	p_Firmicutes	c_Bacilli	o_Izemoplasmatales	f_Izemoplasmataceae
OTU_5349	Water	0.97016	0	1	Peripherals	k_Bacteria	p_Bacteroidota	c_Bacteroidia	o_Flavobacteriales	f_Flavobacteriaceae
OTU_5352	Water	0.00968776	0	2	Peripherals	k_Bacteria	p_Proteobacteria	c_Gammaproteobacteria	o_Gammaproteobacteria__Incertae__Sedis	f_Unknown__Family
OTU_5353	Water	-0.30032	0	2	Peripherals	k_Bacteria	p_Proteobacteria	c_Gammaproteobacteria	o_Nitrococcales	f_Nitrococcaceae
OTU_5355	Water	-0.145316	0	2	Peripherals	k_Bacteria	p_Firmicutes	c_Bacilli	o_Izemoplasmatales	f_Izemoplasmataceae
OTU_5378	Water	1.40472	0	2	Peripherals	k_Bacteria	p_Proteobacteria	c_Gammaproteobacteria	o_Nitrococcales	f_Nitrococcaceae
OTU_5381	Water	-0.202198	0	1	Peripherals	k_Bacteria	p_Bacteroidota	c_Bacteroidia	o_Flavobacteriales	f_Flavobacteriaceae
OTU_5386	Water	-0.920337	0	2	Peripherals	k_Bacteria	p_Firmicutes	c_Bacilli	o_Izemoplasmatales	f_Izemoplasmataceae
OTU_550	Water	-0.0713376	0	3	Peripherals	k_Bacteria	p_Proteobacteria	c_Gammaproteobacteria	o_Gammaproteobacteria__Incertae__Sedis	f_Unknown__Family
OTU_553	Water	1.75173	0	1	Peripherals	k_Bacteria	p_Bacteroidota	c_Bacteroidia	o_Flavobacteriales	f_Flavobacteriaceae
OTU_594	Water	-0.30032	0	2	Peripherals	k_Bacteria	p_Bacteroidota	c_Bacteroidia	o_Flavobacteriales	f_Flavobacteriaceae
OTU_598	Water	-0.145316	0.197531	2	Peripherals	k_Bacteria	p_Proteobacteria	c_Gammaproteobacteria	o_Gammaproteobacteria__Incertae__Sedis	f_Unknown__Family
OTU_601	Water	-0.784714	0.5	3	Peripherals	k_Bacteria	p_Proteobacteria	c_Gammaproteobacteria	o_Gammaproteobacteria__Incertae__Sedis	f_Unknown__Family
OTU_603	Water	0.00968776	0	2	Peripherals	k_Bacteria	p_Firmicutes	c_Bacilli	o_Izemoplasmatales	f_Izemoplasmataceae
OTU_608	Water	-0.610329	0	2	Peripherals	k_Bacteria	p_Actinobacteriota	c_Actinobacteria	o_Micrococcales	f_Microbacteriaceae
OTU_615	Water	-0.202198	0	1	Peripherals	k_Bacteria	p_Bacteroidota	c_Bacteroidia	o_Flavobacteriales	f_Flavobacteriaceae
OTU_617	Water	-0.0719357	0	1	Peripherals	k_Bacteria	p_Proteobacteria	c_Gammaproteobacteria	o_Nitrococcales	f_Nitrococcaceae
OTU_627	Water	-0.592984	0.21875	1	Peripherals	k_Bacteria	p_Bacteroidota	c_Bacteroidia	o_Flavobacteriales	f_Flavobacteriaceae
OTU_636	Water	3.26477	0	2	Module hubs	k_Bacteria	p_Proteobacteria	c_Gammaproteobacteria	o_Gammaproteobacteria__Incertae__Sedis	f_Unknown__Family
OTU_642	Water	-1.07534	0	2	Peripherals	k_Bacteria	p_Proteobacteria	c_Gammaproteobacteria	o_Gammaproteobacteria__Incertae__Sedis	f_Unknown__Family
OTU_643	Water	-0.592984	0	1	Peripherals	k_Bacteria	p_Proteobacteria	c_Gammaproteobacteria	o_Nitrococcales	f_Nitrococcaceae
OTU_645	Water	2.78217	0.549383	3	Module hubs	k_Bacteria	p_Actinobacteriota	c_Actinobacteria	o_Micrococcales	f_Microbacteriaceae
OTU_732	Water	-0.145316	0	2	Peripherals	k_Bacteria	p_Proteobacteria	c_Gammaproteobacteria	o_Gammaproteobacteria__Incertae__Sedis	f_Unknown__Family
OTU_733	Water	-0.920337	0	2	Peripherals	k_Bacteria	p_Proteobacteria	c_Gammaproteobacteria	o_Nitrococcales	f_Nitrococcaceae
OTU_734	Water	-0.610329	0	2	Peripherals	k_Bacteria	p_Proteobacteria	c_Gammaproteobacteria	o_Gammaproteobacteria__Incertae__Sedis	f_Unknown__Family
OTU_740	Water	0.0583263	0	1	Peripherals	k_Bacteria	p_Actinobacteriota	c_Actinobacteria	o_Micrococcales	f_Microbacteriaceae
OTU_743	Water	1.24972	0	2	Peripherals	k_Bacteria	p_Proteobacteria	c_Gammaproteobacteria	o_Gammaproteobacteria__Incertae__Sedis	f_Unknown__Family
OTU_746	Water	0.319696	0.391111	2	Peripherals	k_Bacteria	p_Actinobacteriota	c_Actinobacteria	o_Micrococcales	f_Microbacteriaceae
OTU_748	Water	0.285351	0.571429	3	Peripherals	k_Bacteria	p_Actinobacteriota	c_Actinobacteria	o_Micrococcales	f_Microbacteriaceae
OTU_760	Water	-0.765333	0	2	Peripherals	k_Bacteria	p_Firmicutes	c_Bacilli	o_Izemoplasmatales	f_Izemoplasmataceae
OTU_762	Water	-0.0719357	0.391111	1	Peripherals	k_Bacteria	p_Actinobacteriota	c_Actinobacteria	o_Micrococcales	f_Microbacteriaceae
OTU_765	Water	-1.11403	0	1	Peripherals	k_Bacteria	p_Proteobacteria	c_Gammaproteobacteria	o_Oceanospirillales	f_Litoricolaceae
OTU_766	Water	0.188588	0	1	Peripherals	k_Bacteria	p_Bacteroidota	c_Bacteroidia	o_Flavobacteriales	f_Flavobacteriaceae
OTU_767	Water	-0.920337	0	2	Peripherals	k_Bacteria	p_Proteobacteria	c_Gammaproteobacteria	o_Gammaproteobacteria__Incertae__Sedis	f_Unknown__Family
OTU_773	Water	0.188588	0	1	Peripherals	k_Bacteria	p_Bacteroidota	c_Bacteroidia	o_Flavobacteriales	f_Cryomorphaceae
OTU_785	Water	0.164692	0	2	Peripherals	k_Bacteria	p_Firmicutes	c_Bacilli	o_Izemoplasmatales	f_Izemoplasmataceae
OTU_789	Water	-0.145316	0	2	Peripherals	k_Bacteria	p_Proteobacteria	c_Gammaproteobacteria	o_Nitrococcales	f_Nitrococcaceae
OTU_832	Water	2.79976	0.128419	2	Module hubs	k_Bacteria	p_Bacteroidota	c_Bacteroidia	o_Flavobacteriales	f_Flavobacteriaceae
OTU_935	Water	-0.784714	0	3	Peripherals	k_Bacteria	p_Actinobacteriota	c_Actinobacteria	o_Micrococcales	f_Microbacteriaceae
OTU_937	Water	1.75173	0.191327	1	Peripherals	k_Bacteria	p_Actinobacteriota	c_Actinobacteria	o_Micrococcales	f_Microbacteriaceae
OTU_951	Water	-0.428026	0	3	Peripherals	k_Bacteria	p_Bacteroidota	c_Bacteroidia	o_Flavobacteriales	f_Flavobacteriaceae
